# Supplementary material
Source: PubMed Central journal article supplement (PMC2888856)
Supplement: NIHMS142361-supplement-1.pdf [file NIHMS142361-supplement-1.pdf]

## SUPPLEMENTARY METHODS AND RESULTS

This document contains supplementary material for:

**Shi et al. Genomewide association study of recurrent early-onset major depressive disorder (GenRED GWAS); and**

**Shyn et al: Novel loci for major depression identified by genome-wide association study of STAR\*D and meta-analysis of three studies.**

### Table of Contents

|                                                                                   | Page |
|-----------------------------------------------------------------------------------|------|
| Listing of supplementary data files                                               | S-2  |
| 1. QUALITY CONTROL ANALYSES                                                       | S-3  |
| a. Genetics of Recurrent Early-Onset Depression (GenRED) dataset and MGS controls | S-3  |
| b. Sequenced Treatment Alternatives to Relieve Depression (STAR*D) dataset        | S-7  |
| c. GAIN-MDD dataset                                                               | S-8  |
| d. Population stratification                                                      | S-10 |
| 2. IMPUTATION OF GENOTYPIC DATA FOR HAPMAP II SNPS                                | S-11 |
| 3. STATISTICAL ANALYSIS OF GENETIC ASSOCIATION                                    | S-13 |
| a. Statistical analysis of individual datasets                                    | S-13 |
| b. Meta-analysis based on Z-scores                                                | S-16 |
| c. Power analyses                                                                 | S-19 |
| 4. SUPPLEMENTARY RESULTS                                                          | S-21 |
| a. Results for SNPs in MDD candidate genes                                        | S-21 |
| b. Supplementary association test results                                         | S-25 |
| c. Intensity (cluster) plots                                                      | S-31 |
| d. Case-control allele frequencies                                                | S-31 |
| e. Gene symbols, descriptions and functions                                       | S-32 |
| 5. SUPPLEMENTARY ACKNOWLEDGEMENTS                                                 | S-35 |
| 6. SUPPLEMENTARY REFERENCES                                                       | S-36 |

| Supplementary Tables                                     | Page | Supplementary Figures                       | Page |
|----------------------------------------------------------|------|---------------------------------------------|------|
| S1: Ns (subjects, SNPs passing QC), 3 datasets           | S-3  | S1: GAIN-MDD principal components           | S-9  |
| S2: Asymptotic correlation of GenRED and STAR*D Z-scores | S-17 | S2: PC scores in relation to ancestry       | S-10 |
| S3: Power analysis - GenRED sample                       | S-20 | S3-S6: Imputation $r^2$ and HapMap coverage | S-12 |
| S4: Power analysis - Meta-analyses                       | S-21 | S7-8: GenRED Q-Q plots                      | S-14 |
| S5: 41 previously-studied candidate genes                | S-22 | S9-11: Meta-analysis Q-Q plots              | S-15 |
| S6: Candidate gene results - GenRED                      | S-23 | S12: Power loss with split control strategy | S-19 |
| S7: Candidate gene results - STAR*D                      | S-24 | S13: Power analysis - STAR*D GWAS           | S-21 |
| S8: Candidate gene results - Meta-analysis               | S-24 | S14: Manhattan plots (GenRED)               | S-25 |
| Tables S9-S10: in intensity plot file (see below)        |      | S15: Manhattan plots (Meta-analyses)        | S-26 |
| S11: Case-control allele frequencies (GenRED)            | S-31 | S16: Browser plots (Meta-analysis Narrow)   | S-27 |

|                                                      |      |  |                                                |      |
|------------------------------------------------------|------|--|------------------------------------------------|------|
| S12: Case-control allele frequencies (meta-analysis) | S-31 |  | S17: Browser plots (Meta-analysis males)       | S-29 |
| S13: Gene information, GenRED GWAS                   | S-32 |  | S18: Browser plots (Meta-analysis females)     | S-30 |
| S14: Gene information, meta-analysis                 | S-33 |  | (Intensity plots S19-S21 are in separate file, |      |
| S15: Gene information, STAR*D                        | S-34 |  | see below.)                                    |      |

**Supplementary files (association test results).** Six supplementary datafiles are provided online:

genred\_supplementary\_data.txt  
 stard\_supplementary\_data.txt  
 meta-analysis\_broad\_supplementary\_data.txt (as zip file)  
 meta-analysis\_narrow\_supplementary\_data.txt (as zip file)  
 candidate\_gene\_results.xls  
 SNP\_intensity\_cluster\_plots.pdf

The GenRED, STAR\*D and meta-analysis files contain data for all SNPs that produced  $P < 0.001$  in at least one of the three analyses (males+females, males, females) for that dataset. There is a key in each file to the content of the data columns, to the right of the actual data. Frequencies of the tested allele are rounded to the first decimal place. Thus, "0" indicates 1-5%, "0.1" indicates 5-15%, etc. The frequencies have been "binned" in this way in order to prevent identification of individual subjects based on individual genotypes from some other source and pooled genotypes from this study.<sup>1</sup>

## 1. QUALITY CONTROL ANALYSES

**Table S1** summarizes the final datasets that results from the QC analyses described in this section (this is an expanded version of the top part of Table 2 in the manuscript, with X chromosome counts added):

**Table S1: Numbers of subjects and genotyped SNPs passing quality control (3 datasets)**

|                | -----AUTOSOMAL----- |         |         |                   | -----X CHROMOSOME----- |        |        |                   |             |
|----------------|---------------------|---------|---------|-------------------|------------------------|--------|--------|-------------------|-------------|
|                | GAIN                | GenRED  | STAR*D  | Total             | GAIN                   | GenRED | STAR*D | Total             |             |
| <b>ALL</b>     | <b>Broad cases</b>  | 1716    | 1020    | 1221              | <b>3957</b>            | 1683   | 1004   | 1211              | <b>3898</b> |
|                | <b>Narrow cases</b> | 469     | 1020    | 702               | <b>2191</b>            | 462    | 1004   | 696               | <b>2162</b> |
|                | <b>Controls</b>     | 1792    |         | 1636 <sup>†</sup> | <b>3428</b>            | 1753   |        | 1607 <sup>†</sup> | <b>3360</b> |
| <b>MALES</b>   | <b>Broad cases</b>  | 524     | 298     | 506               | <b>1328</b>            | 493    | 291    | 506               | <b>1290</b> |
|                | <b>Narrow cases</b> | 113     | 298     | 276               | <b>687</b>             | 106    | 291    | 271               | <b>668</b>  |
|                | <b>Controls</b>     | 681     |         | 918 <sup>†</sup>  | <b>1599</b>            | 644    |        | 918 <sup>†</sup>  | <b>1562</b> |
| <b>FEMALES</b> | <b>Broad cases</b>  | 1192    | 722     | 715               | <b>2629</b>            | 1190   | 713    | 715               | <b>2618</b> |
|                | <b>Narrow cases</b> | 356     | 722     | 426               | <b>1504</b>            | 356    | 713    | 425               | <b>1494</b> |
|                | <b>Controls</b>     | 1111    |         | 718 <sup>†</sup>  | <b>1829</b>            | 1109   |        | 689 <sup>†</sup>  | <b>1798</b> |
|                | <b>SNPs (N)</b>     | 427,874 | 646,431 | 254,857           |                        | 6,438  | 22,546 | 5,617             |             |

<sup>†</sup> GenRED and STAR\*D analyses used the same screened controls; the meta-analysis corrected for this overlap.

### a. Genetics of Recurrent Early-Onset Depression (GenRED) dataset and MGS controls

This section describes QC procedures for the GenRED dataset for both the GWAS report and for the meta-analysis report. The two datasets are exactly the same except: (1) both reports include both genotyped and imputed SNPs, but the GenRED report includes genotyped SNPs that are not in HapMap II, whereas the meta-analysis report includes only HapMap II SNPs (whether genotyped or imputed) to permit imputation in other datasets where needed; and (2) thus, GenRED QQ plots are slightly different for the GWAS and meta-analysis reports, because the non-HapMap SNP data are missing from the latter.

**Subjects.** Subject recruitment and selection were as described in the main text of the GenRED paper, and characteristics of the sample are summarized in Table 1. The GenRED GWAS consisted of 1,110 MDD cases (of whom 1,020 were available post-QC) and 1,636 controls selected from a larger MGS European-ancestry control sample after all QC procedures were applied to that dataset (see below). All subjects are of self-reported European ancestry, and ancestry was further checked based on genotypes as described below. MGS subjects were genotyped in two phases (as described elsewhere<sup>2,3</sup>). The MGS-GAIN (Genetic Association Information Network) subjects were genotyped during November-December of 2007 and the remaining “NonGAIN” MGS subjects were genotyped during May-July 2008. The European-ancestry genotyped sample of the MGS GWAS project (GAIN + NonGAIN, pre-QC) included 2,838 schizophrenia cases, 2,817 controls, 61 duplicates and 62 trios (for quality control analyses). We selected our 1,636 controls (863 from MGS-GAIN and 773 from MGS-NonGAIN) based on absence of lifetime major depressive disorder as described in the text. All MGS control data have been deposited in dbGAP. The NonGAIN control data are still under the dbGAP embargo period, and are used here as part of a collaboration with the MGS GWAS project. GenRED cases were genotyped in the winter of 2007-8. All subjects were genotyped using the same platform and procedure. Because the cases and controls

were genotyped separately, we included QC procedures designed to filter out false positive results that could result from technical differences in genotyping quality for cases and controls.

**Genotyping.** All genotyping for case and control samples was carried out by the National Center for Genotyping and Analysis at the Broad Institute. All subjects were genotyped using the Affymetrix 6.0 array, which assays 906,600 SNPs and 946,000 monomorphic copy number probes (the latter are not considered here). Genotype calls were made by the BIRDSEED module of the BIRDSUITE package (version 2).<sup>4</sup> Genotypes were called separately for each plate (i.e., for each set of ~ 92 DNAs aliquoted onto the same plate and thus assayed at approximately the same time) as recommended by the authors of BIRDSUITE. Genotypes with confidence score > 0.1 were set as missing.<sup>4</sup>

**MGS controls.** We selected 1,636 MGS controls that passed MGS QC filters, and the same control genotypes were used for the STAR\*D GWAS analysis as described below, while the meta-analysis of GenRED, STAR\*D and GAIN-MDD corrected for this overlap. Note that the same analytic group was responsible for the MGS and GenRED GWAS analyses, so we were familiar with all aspects of the MGS QC procedures and results. Here we briefly describe the MGS QC criteria and results that are relevant to the GenRED GWAS and meta-analysis of the GenRED and STAR\*D samples.

MGS control subjects were removed if any of the following criteria were met:

- (1) genotyping call rate <97%;
- (2) the gender predicted by X chromosome genotypes was inconsistent with the gender reported by the site or control data file;
- (3) heterozygous genotypes > 28.5% or < 26.0% (based on all SNPs, prior to QC), a criterion that was established by inspection of the distribution of values in relation to call rates as an indicator of poor genotyping quality;
- (4) the subject was an outlier in the distributions of scores for ancestry-informative Principal Components 1 and 2 from the EigenStrat analysis;
- (5) the subject had estimated kinship > 10% with more than 50 subjects, based on pairwise IBD estimates computed by PLINK (we considered this an indicator of poor genotyping quality, given that we did not observe any unusual clusters of ancestry which could also explain such a finding);
- (6) in the case of unexpected duplicates or close relatives, the subject with the lower call rate was removed from each such pair.

After autosomal QC, 1,636 MGS controls were qualified for GenRED GWAS. We then performed additional QC of X chromosome data and removed 27 additional subjects from X chromosome analysis because of low X chromosome call rate or unusual heterozygosity proportion (for females).

**GenRED cases.** Of 1,110 depression cases (one per family) submitted for genotyping, 1,092 were genotyped successfully. The following is the summary of the QC filters for subjects:

- (1) Fifteen subjects were removed for call rates less than 97.4%, a threshold chosen according to the observed distribution of call rates and evaluation of the effect of alternative thresholds on Genomic Control  $\lambda$  values.

- (2) Twenty-five additional subjects were removed who were outliers of the distribution of proportion of heterozygous genotypes. For a homogenous population, unusually high or low heterozygosity values are thought to occur primarily because of genotyping/DNA quality problems. For cases, outliers had heterozygosity  $< 31.06\%$  or  $> 33.21\%$  because on inspection of the distribution in relation to call rates. (Note that the thresholds are higher than for controls because for cases we excluded rare SNPs before computing heterozygosity.) An additional 13 were heterozygosity outliers but were already excluded because of low call rates.
- (3) Five subjects were excluded as ancestry outliers. We performed Principal Components Analysis as described in the main text using EIGENSTRAT<sup>5</sup> using the genotypes (for SNPs typed successfully in these groups) of the GenRED case subjects, 1,636 selected controls and the 269 Hapmap II subjects. Ancestry outliers were removed by visual check of the first two principal component scores.
- (4) Six subjects were removed because the gender predicted by X chromosome genotypes was not consistent with that reported by the recruitment site.
- (5) Twelve subjects were excluded because of cryptic relatedness or unexpected duplicates. According to the estimated kinship coefficients, we found two unexpected duplicates, five sibling pairs, two parent-child pairs and one grandparent-child pairs.
- (6) Nine subjects were excluded from association analysis because they had an ineligible family history of depression or had an ineligible proband diagnosis.

After subject quality control, 1,020 GenRED cases remained for association analysis for autosomal SNPs.

Sixteen GenRED cases (7 males and 9 females) were removed from association analysis for SNPs on the X chromosome because of low call rate for X chromosome genotypes (less than 99% for males and 97% for females). Twenty-nine MGS controls were also removed from X chromosome association analysis. So, 1,004 GenRED cases and 1,607 MGS controls remained for X chromosome association analysis.

**SNP QC.** For the controls, to correct for any technical differences in the genotyping of the GAIN and NonGAIN controls, we performed separate SNP QC for MGS-GAIN, MGS-NonGAIN, and the combined MGS GAIN+NonGAIN datasets. We applied SNP QC criteria to each of these analyses separately, and excluded any SNP that failed any criterion in any of these three analyses. Criteria for each parameter were selected based in part on extensive evaluations of the effects of alternative criteria on GC  $\lambda$  values. SNPs were excluded that met any of the following criteria:

- (1) SNP call rate  $< 95\%$ ;
- (2) P-value for deviation from Hardy-Weinberg Equilibrium  $< 10^{-6}$  (in controls);
- (3) MAF  $< 1\%$ ;
- (4) failed plate effect test: for each SNP, allele frequencies of each plate were tested against all other plates combined, and a SNP failed if one plate had a  $\chi^2[1]$  test with  $P < 10^{-8}$  or 2 plates had  $P < 10^{-4}$ ;
- (5)  $> 2$  trios with a Mendelian error;
- (6)  $> 1$  discordant genotype in duplicate pairs;
- (7)  $> 2$  discordant genotypes in 93 subjects (31 trios) genotyped twice (MGS-GAIN and NonGAIN).

Based on control sample QC only, 671,424 autosomal SNPs and 25,068 X chromosome SNPs were eligible for further analysis.

Next, we removed SNPs with call rate less than 97% or MAF less than 1% in GenRED cases. Then, because the GenRED cases and MGS controls were genotyped separately, we applied an additional filter based on case-control call rate difference (CCCRD) between GenRED cases and MGS controls. The rationale here was that if the call rate was much lower in one experiment, this could have been due to a technical factor that could produce differential (rather than random) missingness and thus could produce a spurious case-control allele frequency difference (false positive test). This effect has been reported previously by Clayton et al.<sup>6</sup> The CCCRDs were computed for all cases and the 1,378 control samples (from the GAIN sample) available in March 2008. We computed the correlation between CCCRD and  $-\log(p)$  of the association test for that SNP; there was a highly significant correlation, which was eliminated when SNPs were excluded that had CCCRD > 2%. This was therefore adopted as a filter criterion. Subsequently, when all MGS control samples (GAIN+NonGAIN) were available, we re-checked the CRD and found that an additional 535 SNPs exceeded the 2% threshold. Because imputation had already been carried out using these SNPs, we did not exclude them. We manually checked the SNPs with the lowest p-values among these 535 SNPs to make sure that the p-values were consistent with other SNPs in the region. For example, the lowest p-value was 0.000075 (rs17689334), which has neighboring SNPs with  $p = 0.00026$  (rs12986994) and  $p = 0.00038$  (rs11894180).

For X chromosome SNPs, we first excluded SNPs failing MGS QC analyses. Then we computed the genotype call rate for male controls, male cases, female controls and female cases. Any SNPs with call rate <99% in male cases or <98% in female cases were removed. The CCCRDs were computed separately for males and females. Any SNPs with CCCRDs > 1% between cases and controls in females or in males were removed from analysis (based on examination of the correlation between CCCRD and  $-\log(P)$ ).

After completion of these additional QC steps involving cases, there were 646,431 autosomal SNPs and 22,546 chromosome X SNPs that passed all QC filters and were used in association testing and for imputation of additional HapMap II SNP data for GenRED cases and for the controls for GenRED analyses. (Note that in the STAR\*D section, below, we describe a separate SNP QC procedure to select a set of SNPs genotyped in STAR\*D cases and GenRED controls; this much smaller set of SNPs was used for imputation of case and control data for the STAR\*D GWAS analysis.)

The imputation procedure described below was applied to the GenRED dataset. Based on a criterion of  $MAF > 1\%$  and imputation  $R^2 > 0.3$  (as recommended by the authors of MACH 1.0<sup>7</sup>, and see discussion in the main text of each paper), an additional 1,849,062 autosomal SNPs and 43,124 chromosome X SNPs (HapMap II) were available for analysis based on imputed genotypic data. Thus, analyses considered 2,495,493 autosomal and 65,670 chromosome X SNPs, for a total of 2,561,163 genotyped or imputed SNPs. The QQ plot for the GenRED GWAS analysis is shown below (**Figure S7**).

## **b. Sequenced Treatment Alternatives to Relieve Depression (STAR\*D) dataset**

QC analyses of this dataset have been described in the main text of this article, and resulted in selection of 1,221 Caucasian STAR\*D cases for inclusion in the meta-analysis. Note that these cases were genotyped with two different platforms as described in the text: 606 with Affymetrix 5.0 and 639 with Affymetrix 500K. The 1,636 MGS/GenRED controls were genotyped with the Affymetrix 6.0 array. The same STAR\*D data have been used for the STAR\*D GWAS analysis and for the meta-analysis reported in the main text.

**SNP QC.** We carried out a new SNP QC procedure, starting with 378,549 SNPs that had been genotyped in both the STAR\*D and GenRED datasets and that had passed QC for the MGS controls (see above for MGS filter criteria). Then, we used three procedures to filter out SNPs with possible case-control differences in genotyping quality, to avoid spurious findings:

**Rate of discordant genotypes in cross-platform duplicates.** There were 806 control subjects who had Affy 6.0 genotypes from MGS, and who also had been genotyped with the Affymetrix 500K array in a previous study, with results made available through the NIMH repository.<sup>8</sup> We verified that the two sets of genotypes for these 806 subjects represented true duplicates by estimating pairwise IBS/IBD with PLINK. Then, for each SNP, discordancy rates within the duplicate pairs were examined, and SNPs were excluded if they had >8 discordant genotypes out of 806 (~1% discordancy rate), because this indicated that genotyping was of low quality for at least one platform. For example, discordancy rate was strongly related with association test p-values with all SNPs included, but there was no significant correlation after excluding the SNPs with >8 discordant genotypes.

**Minor allele frequency.** Rare SNPs are more vulnerable to genotyping errors due to the nature of clustering algorithm for genotyping calling and because for a given number of errors, the trend test will be more greatly affected for rare SNPs; thus the risk of spurious findings is greater for rare SNPs when using genotypes from two different platforms, where there is potential for genotyping error in either platform. Therefore, we excluded SNPs with MAF < 5% in either cases or controls in STAR\*D. However, we imputed genotypic data for SNPs with MAF between 1-5% in this dataset, and used the results in the meta-analysis if the imputation  $R^2$  was > 0.3.

**Call rate difference between cases and controls.** We excluded SNPs with call rate < 98% in either MGS controls or STAR\*D cases, and we also excluded SNPs with case-control call rate difference > 2%.

**X chromosome QC.** For X chromosome analysis, 10 additional STAR\*D cases (plus 29 MGS controls as noted above) were excluded for average call rates < 97%. We then filtered out SNPs failing MGS SNP QC or with > 7 discordant genotypes based on the MGS controls genotyped twice. For the remaining SNPs, we computed QC metrics separately for males and females and excluded SNPs with call rate < 98%, or MAF < 5%, or case-control call rate difference > 2%.

**Marker coverage estimation.** Because a smaller number of genotyped SNPs was available for the STAR\*D analysis, we estimated genome-wide coverage of common SNPs empirically. The results are reported in the main text. We downloaded the ten 500 kb genomic regions studied in HapMap ENCODE

(<http://www.hapmap.org/downloads/encode1.html.en>) and used the Tagger algorithm in Haploview to determine what proportion of HapMap ENCODE CEU SNPs were captured by the markers remaining in our panel, post-QC, within each respective ENCODE interval plus an additional 500 kb upstream and downstream. These numbers were the basis for the figures we reported in Results at  $r^2$  levels of 0.50 and 0.80. We used this approach to estimate coverage in order to reduce the bias of using only HapMap SNPs, which leads to upward biases in the extent of coverage<sup>9</sup>.

### c. GAIN-MDD dataset

**Genotyping.** Genotyping procedures using the Perlegen platform have been described in the published GWAS report for this dataset.<sup>10</sup> This dataset was made available to qualified scientists through the dbGAP website. We obtained approved access to carry out genetic association analyses of major depressive disorder and related disorders, and carried out our own QC procedures to ensure consistency with the other two datasets in our meta-analysis and because no post-QC data had been made available through dbGAP when we initially accessed the data. There are some small differences between our results for this dataset and the previously published results<sup>10</sup>, but these are minor and are mainly due to our exclusion of a slightly larger number of ancestry outliers (individuals with higher proportions of non-European ancestry according to our principal components analysis).

The original dataset downloaded from dbGap had genotypes and quality scores for 598,123 SNPs in 3,761 subjects (1,821 cases, 1,822 controls, 73 parents forming 36 complete trios and 20 duplicates of whom 9 were controls and 11 were cases. For the Perlegen quality score for each genotype, larger scores imply better quality, with a recommendation by the company to remove SNPs with quality score < 7. For consistency with the published report, however, we applied a filter of < 10 which was recommended by consultants to the GAIN program. Such a high threshold lowered the call rate (sometimes to as low as 89%, ) compared to a mean call rate of 98% <7 as the criterion.

**Sample QC.** Pairwise kinship was estimated for all pairs of subjects using PLINK based on 59K SNPs (every 10<sup>th</sup> SNP along each chromosome). We excluded thirty-eight subjects (excluding the pair member with the lower call rate) who were related to other subjects: we found fourteen parent-child pairs, one affected sibling trio, thirteen sibling pairs and eleven second degree relative pairs. In addition, we found a set of nine subjects, each pair of which had an estimated kinship larger than 0.1. Ancestry analysis based on principal components suggested that these nine subjects had similar ancestry and were likely to have a high Asian admixture, but they were unlikely to be relatives. These subjects were excluded as ancestry outliers as discussed below.



Additional exclusions, based where appropriate on inspection of distributions and evaluation of effects of alternative criteria on GC  $\lambda$  scores, included:

- (1) One subject was removed because of low heterozygosity proportion of 24.6% which was a clear outlier to the distribution of values, indicating likely genotyping problems.
- (2) Eight subjects were excluded due to call rate < 97%.
- (3) Seven subjects were removed because the gender predicted by X chromosome genotypes was in

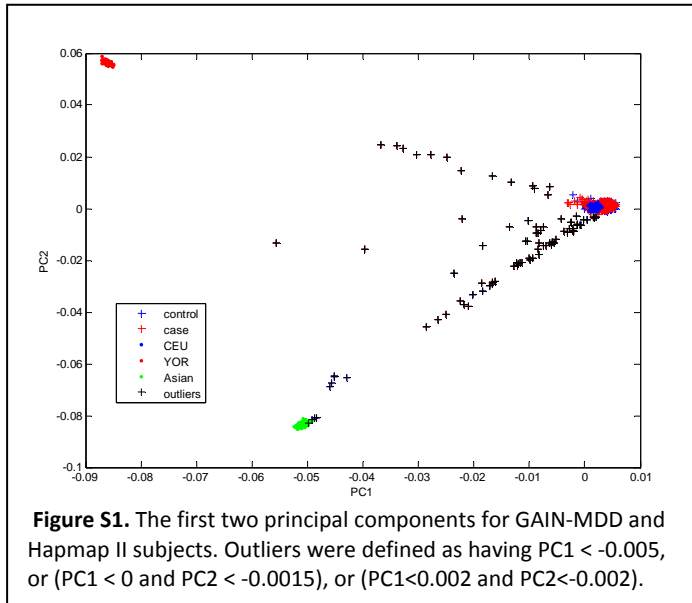

consistent with the gender in the downloaded datafile.

- (4) We merged the genotypes of the GAIN MDD subjects with Perlegen genotypes for 269 Hapmap II subjects and then computed principal components (EIGENSTRAT<sup>5</sup>). Based on visual inspection of scores for the first two principal component scores (see **Figure S1**), we excluded 81 subjects as ancestry outliers.

After sample QC, 3,508 subjects (1,716 cases and 1,792 controls) remained for association analysis.

**SNP QC.** We filtered out SNPs that met at least one of the following criteria:

- (1) MAF < 1%;
- (2) The number of discordant genotypes > 1 out of 20 duplicate pairs;
- (3) Mendel error > 1 in 36 complete trios;
- (4) Call rate < 95%;
- (5) P-value for deviation from (in controls) <  $10^{-6}$ .
- (6) CCCRD > 2%.

Removing or SNPs for HWE deviation remains controversial. For GAIN MDD, ~ 2,500 SNPs passed other QC filters but failed the HWE test. Sullivan et al.<sup>10</sup> chose not to remove these SNPs from analysis on the grounds that deviation from HWE did not necessarily reflect poor genotyping quality. Here, however, the meta-analysis required imputation of data for most SNPs, and the imputation algorithms assume HWE. Therefore we did exclude SNPs based on deviation from HWE in controls. After QC, 427,874 (out of 585,874) autosomal SNPs remained for association analysis.

For the **X chromosome**, many SNPs had low call rates in the GAIN-MDD dataset. Therefore we filtered out these SNPs before computing call rates for samples. We computed the SNP QC metrics separately for males and female, but the final exclusion thresholds were the same as 1-6 above. After SNP QC, 6,438 SNPs (out of 11,540) remained for association analysis. (Note that a less stringent quality score criterion would result in a larger number of X SNPs for analysis.) Based on these SNPs, we computed the

call rate and heterozygosity proportion for the 3,508 subjects who passed QC for autosomal SNP analysis; 33 cases and 39 controls were excluded from X chromosome analysis because of call rate.

#### d. Population stratification

Analysis of population stratification was carried out using the 81,913 SNPs autosomal SNPs (post-QC) that were genotyped in all three studies, after removing 448 SNPs from the MHC region (chr6:25-35 Mb) and the common 8p inversion region (chr8:8-12 Mb) because these regions produce highly local components that do not appear to reflect geographical ancestry (data not shown). Principal component (PC) scores were computed (using EIGENSTRAT) for the combined three-study dataset. We used the top 10 PC scores as covariates in logistic regression association analysis to control for the effects of population stratification.

Principal components were computed separately for the X chromosome, using 1,232 post-QC SNPs that were genotyped in all three studies. The top 10 PC scores from this analysis were used as covariates in logistic regression analysis for X chromosome SNPs. **Figure S2** illustrates PC scores 1-5 for a subset of GenRED subjects and MGS controls who self-reported a single ancestry in all grandparents.

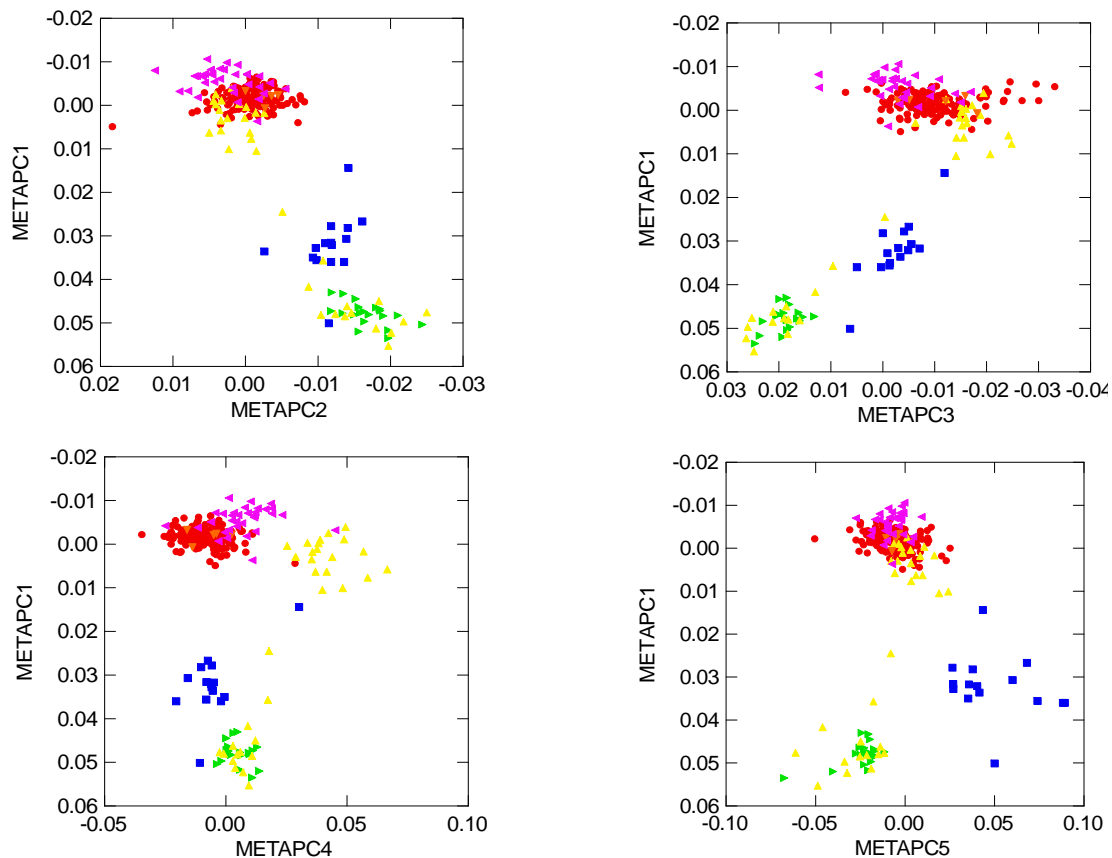

**Figure S2. PC Scores for subjects self-reporting one ancestry. Red=Anglo-Saxon, Blue=Mediterranean, Green=Ashkenazi, Yellow=Slavic, Orange=No.European, Purple=W.European**

The plots illustrate the top 5 PC scores for a subset of GenRED and MGS subjects who self-reported a single European ancestry, to inform the interpretation of the geographical origin of the components. The PC scores were computed as described above for all meta-analysis subjects together. Note that these are within-Europe variations; if inspected in relation to HapMap CEU, YRI and CHB/JPT data, all of these subjects are in the “European” cluster. The geographical distribution of the top 5 PCs is as follows:

| PC | Geographical distribution                                                                                                                                                                    |
|----|----------------------------------------------------------------------------------------------------------------------------------------------------------------------------------------------|
| 1  | North-South - Anglo-Saxon and N/W Eur at, top, Ashkenazi at bottom. Note: the Ashkenazi cluster includes a subset of Ashkenazi Jewish subjects who self-report as “Russian/Slavic” ancestry. |
| 2  | Also primarily North-South in this subset (differentiates Asian in other datasets).                                                                                                          |
| 3  | Separates Ashkenazi from other ancestries.                                                                                                                                                   |
| 4  | East-West - non-Ashkenazi Slavic subjects are separated to the right.                                                                                                                        |
| 5  | Separates Mediterranean (mostly Italian and Greek) from other ancestries.                                                                                                                    |

## 2. IMPUTATION OF GENOTYPIC DATA FOR HAPMAP II SNPS

There were ~ 90,000 post-QC SNPs common to all datasets -- too few for a meta-analysis. Therefore, we used MACH 1.0<sup>7</sup> (<http://www.sph.umich.edu/csg/abecasis/mach/index.html>) to impute autosomal SNPs and IMPUTE<sup>11</sup> (<http://www.stats.ox.ac.uk/~marchini/software/gwas/impute.html>) for X chromosome SNPs for the three datasets. The training data consisted of phased autosomal haplotypes of 60 Hapmap II CEU subjects and 90 sets of phased X (CEU) haplotypes. MACH and IMPUTE estimated genotypes conditioning on the flanking markers and linkage disequilibrium, as a “dosage” of one of the alleles (i.e., the estimate is non-integer, reflecting the weighted probabilities of each possible genotype); and, for each SNP, the imputation information content  $r^2$ . This is an estimate of the squared correlation that would be observed between the imputed and real genotypes, if the real genotypes were known. MACH computes  $r^2$  from the variance of the imputed genotypes divided by the expected variance (which is  $2p(1-p)$ , where  $p$  = allele frequency). For the X chromosome, we computed the expected variance as  $4p(1-p)$  for males. The effective sample size of a test for the SNP is proportional to  $r^2$ . Hence, SNPs with  $r^2 < 0.3$  or MAF  $< 0.01$  in any of the three data sets were excluded from meta-analysis because of insufficient power (see discussion in text of each paper). The meta-analysis thus included 2,339,408 autosomal and 51,795 X chr SNPs with  $rsq > 0.3$  and MAF  $> 1\%$  in all three studies, totaling 2,391,203 SNPs.

For STAR\*D, we used the same 254,857 SNPs to impute case and control genotypes; but 646,431 SNPs were used to impute genotypes for these same controls for GenRED. Thus an imputed SNP could have a different estimated genotypic dosage for the same subject in the two analyses (as shown in Table S12). This was necessary because we observed an inflated variance in the empirical distribution of STAR\*D test statistics when imputation was carried out using different sets of markers for cases and controls, suggesting that this sometimes resulted in systematically different genotype calls in cases vs. controls.

The distributions of imputation  $r^2$  values in the three studies are illustrated in **Figures S3 and S4** for autosomal and X chromosome SNPs. For autosomal SNPs, average  $r^2$  is higher for GAIN and GenRED because STAR\*D had fewer genotyped SNPs as a basis for imputation. For X chromosome SNPs, GenRED  $r^2$  is higher because of the larger number of genotyped X chromosome SNPs. Males have slightly higher average  $r^2$  for X chromosome SNPs in all studies because more SNPs passed QC filters for males.

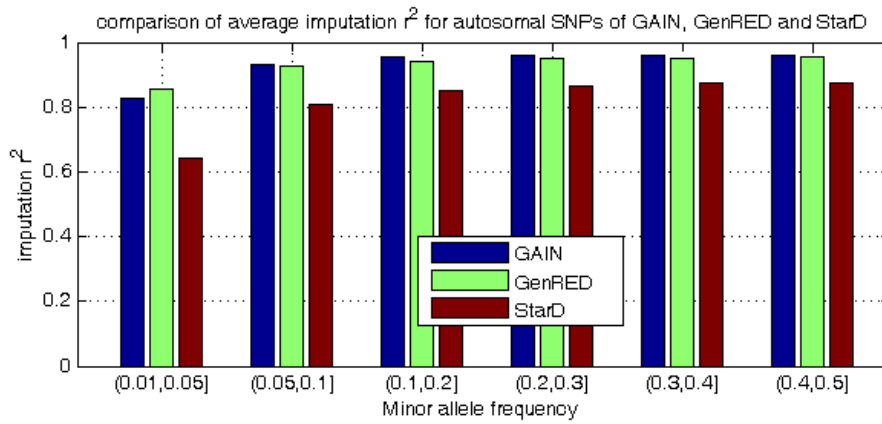

**Figure S3.** Average imputation  $r^2$  of the three datasets (autosomal SNPs).

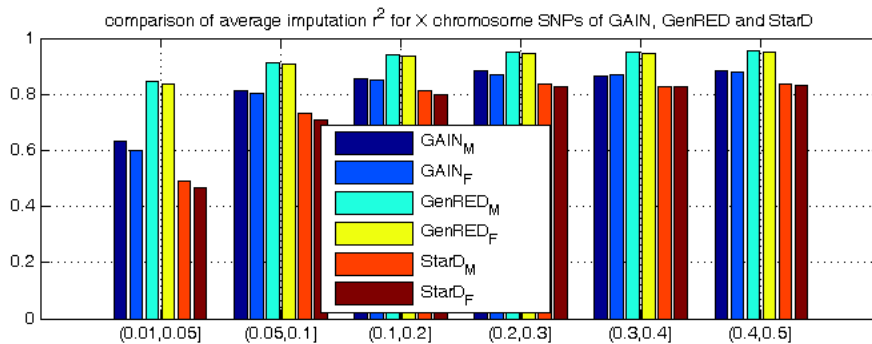

**Figure S4.** Average imputation  $r^2$  of the three studies (X chromosome SNPs).

In **Figures S5 and S6**, we also compared the datasets for coverage (the proportion of all common Hapmap SNPs with imputation  $r^2 >$  a threshold). STAR\*D has a lower coverage for autosomal SNPs, while males have slightly higher coverage than females for X chromosome SNPs in all three studies.

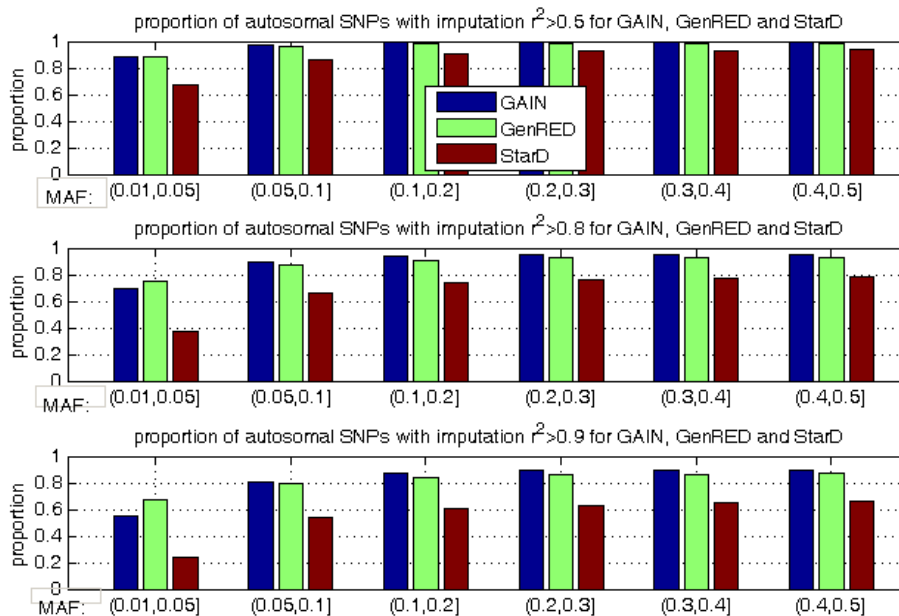

**Figure S5.** HapMap coverage for the three studies (autosomal SNPs).

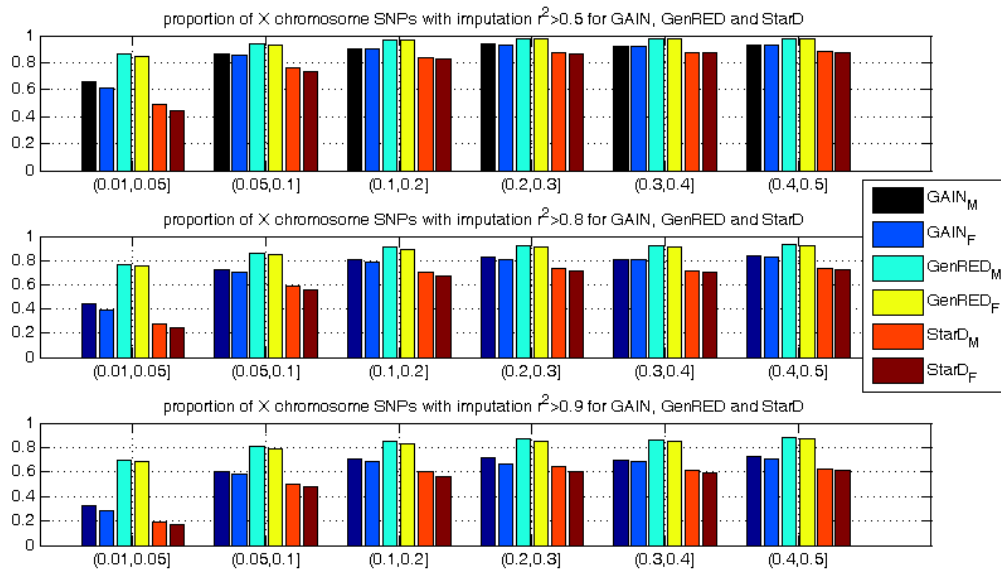

**Figure S6.** HapMap coverage for the three studies (X chromosome).

### 3. STATISTICAL ANALYSIS OF GENETIC ASSOCIATION

**a. Statistical analysis of individual datasets.** For each study, we performed logistic regression analyses to derive a Wald Z test statistic for each SNP, correcting for potential population stratification using the top 10 ancestry-informative principal components. If a SNP was genotyped and passed SNP QC filters, we used the Z statistic based on real genotypes without imputing the missing genotypes (using PLINK), because for these SNPs, imputing the missing genotypes tends to shrink larger Z scores slightly (data not shown). If a SNP was not genotyped or did not pass QC filters, the logistic regression analysis was carried out based on the imputed genotypic dosages (using custom software implementing the same procedure as PLINK, but permitting input files with non-integer dosage values). For X chromosome SNPs, we also corrected for sex in the logistic regression to avoid potential bias that could result because there were unequal numbers of cases and controls of each gender, and there are likely to be some technical differences in genotype calling and imputation for males (homozygous) and females (hemizygous). For SNPs on male X chromosomes, the two homozygous genotypes were coded as 0 and 2. For each SNP in each study, we determined the Z statistic value, the tested allele, the allele frequency of the control subjects, the number of cases/controls and the imputation information content. These summary statistics were then used to construct a test for the meta-analysis as described below.

Genomic control (GC)  $\lambda$  values will be  $> 1$  when systematic genotyping differences (e.g., call rate, genotyping error rate) exist between cases and controls or in the presence of population substructure.

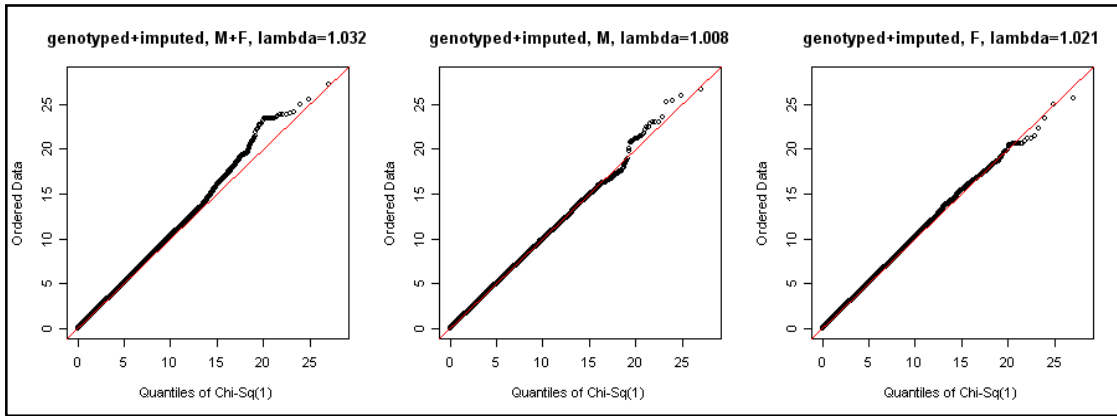

**Figure S7.** QQ plots for GenRED (genotyped and imputed SNP data used for GenRED GWAS analysis).

Non-HapMap genotyped SNPs are included above but not in the meta-analysis (below) (because they could not be imputed in other datasets). Thus, Figures S7 and S8 are slightly different.

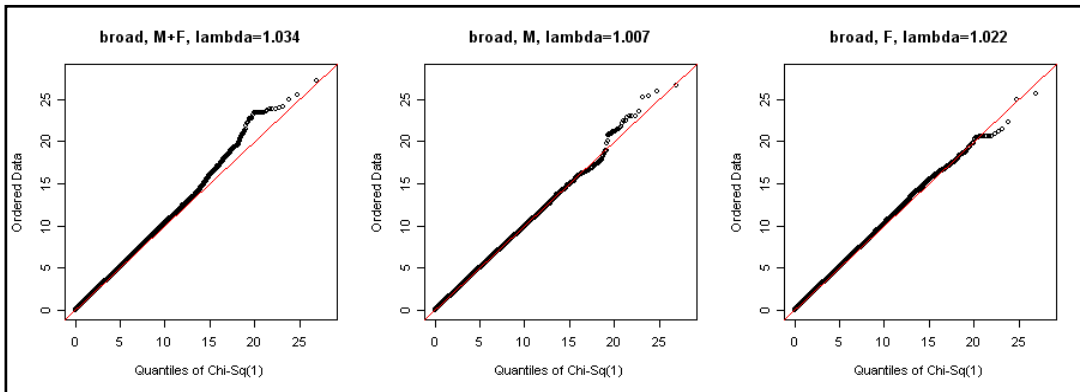

**Figure S8:** QQ plots of GenRED analysis for meta-analysis (non-HapMap SNPs excluded).

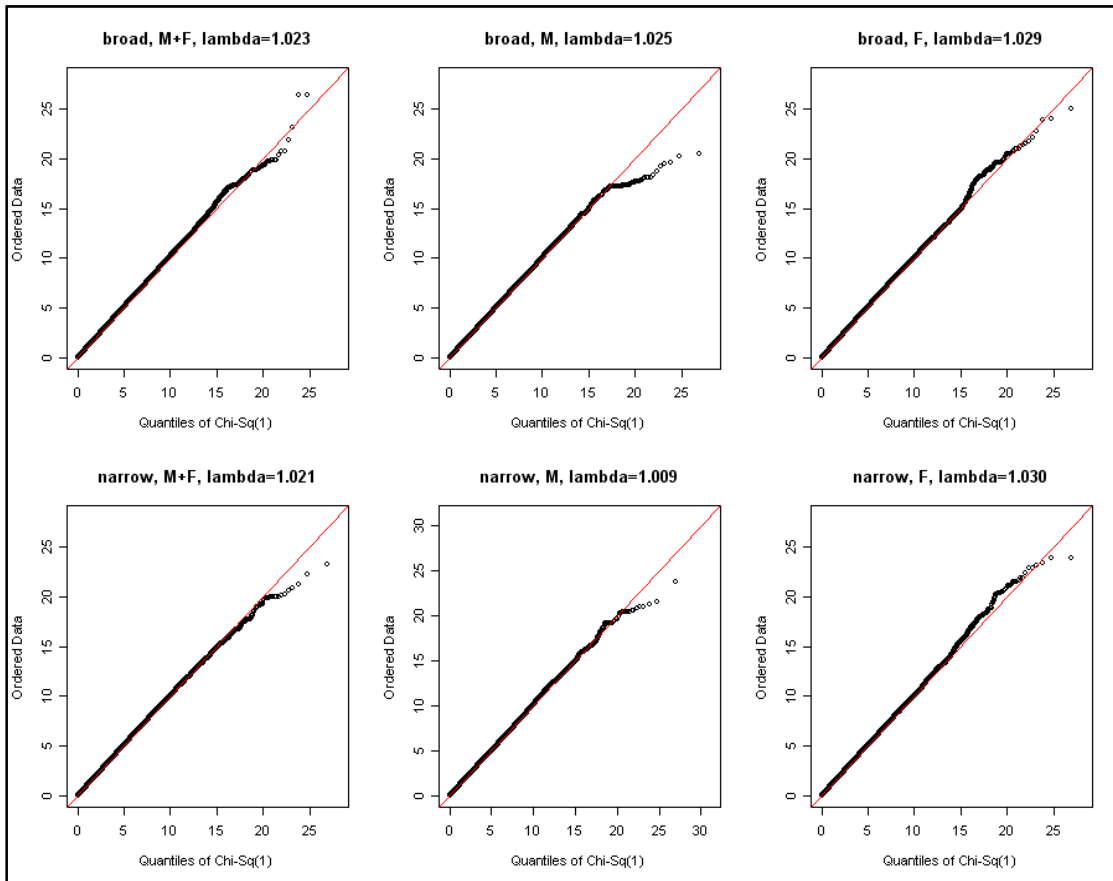

**Figure S9.** QQ plots for STAR\*D analysis for meta-analysis.

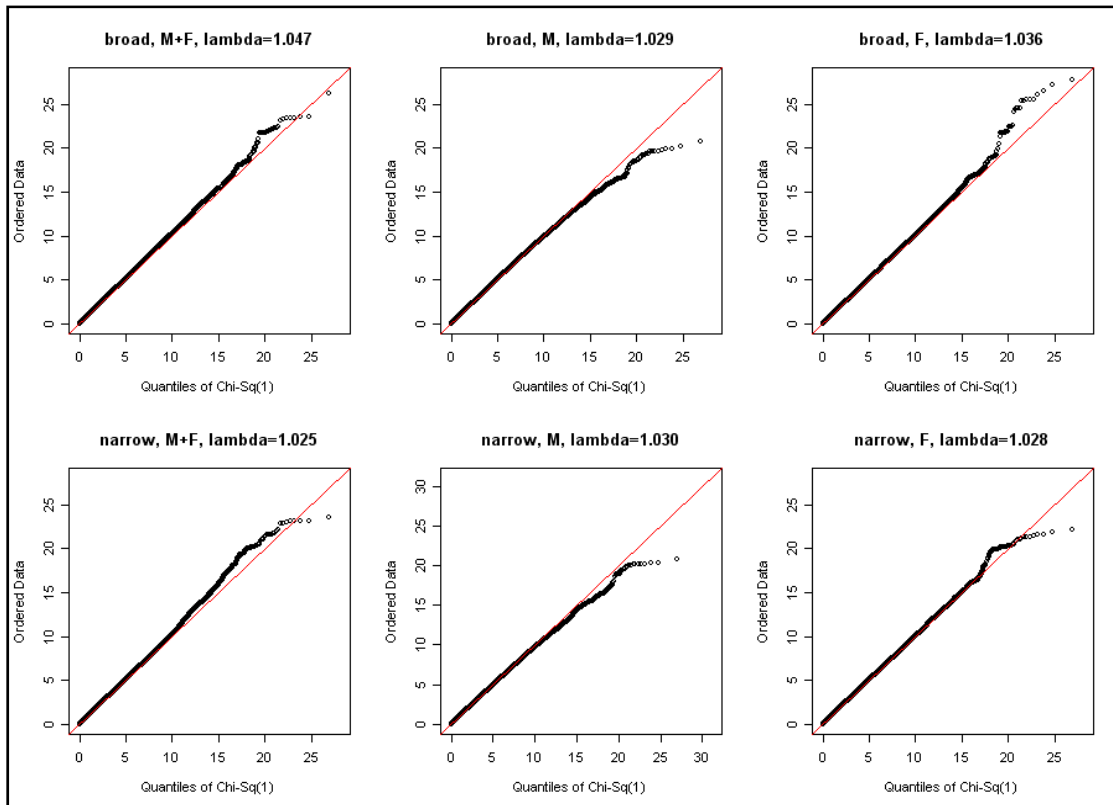

**Figure S10.** QQ plots for GAIN-MDD analysis for meta-analysis.

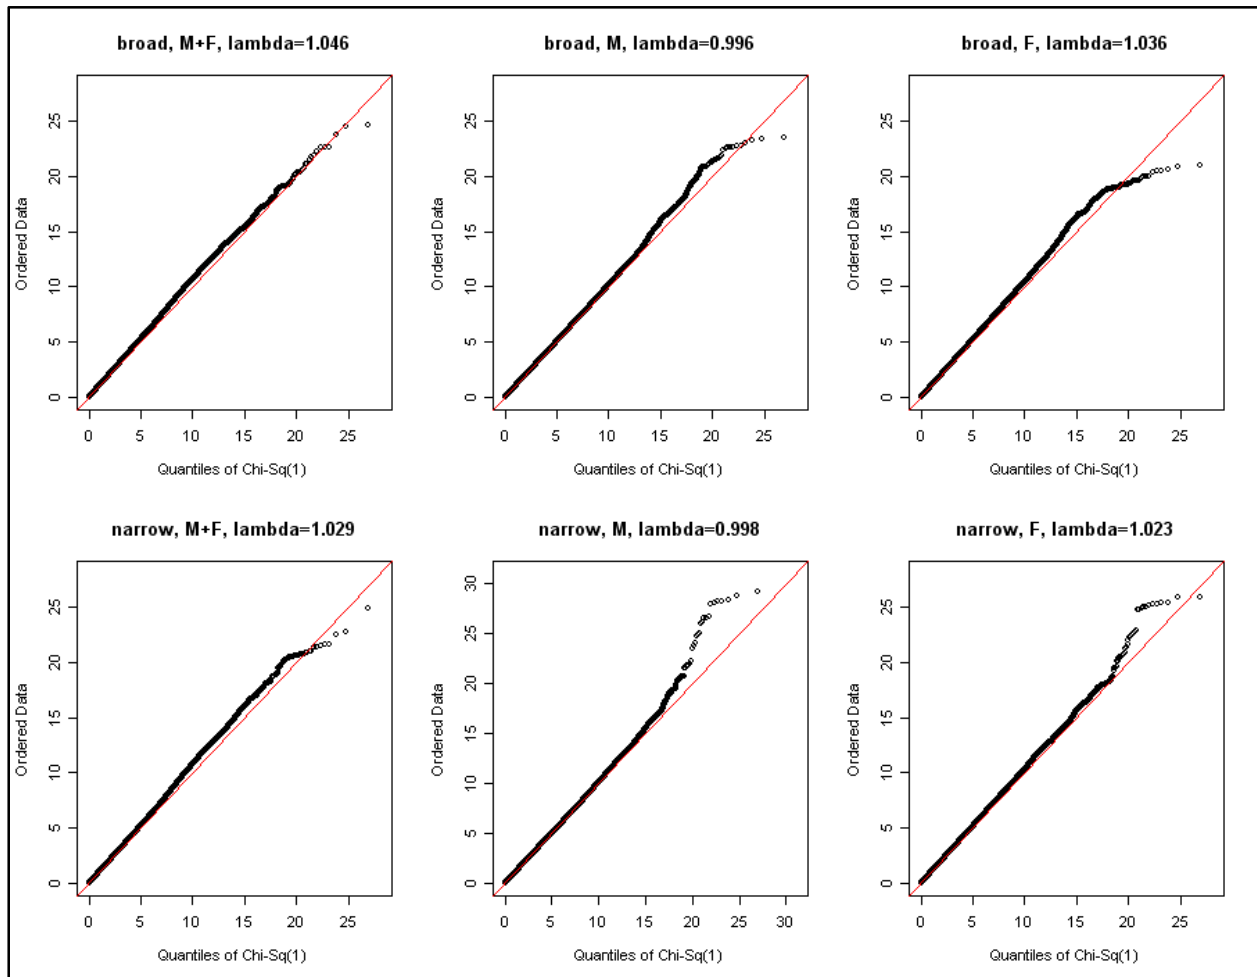

**Figure S11.** QQ plots for the meta-analysis of 3 datasets.

**b. Meta-analysis based on Z-scores.** We considered whether to perform a “mega-analysis” with the combined genotypic data for three datasets. This would require imputing data for non-genotyped HapMap SNPs for each dataset, and then performing an association test for each SNP based on the genotypic dosages, with covariates for population stratification and perhaps also using an indicator for each study to reduce artifacts. This approach is computationally intensive but manageable. However, because 1,636 common controls were used in the GenRED and STAR\*D analyses, these analyses are correlated. This can be handled more easily in the context of a meta-analysis (see below). We have (1) computed the Wald Z-statistic for each study with appropriate correction for population stratification, and (2) combined the Z-statistic values from three studies with appropriate correction for the sample size of each study, the correlation between test statistics due to shared controls, and the imputation  $r^2$  for each study. The proposed meta-analysis approach is the most powerful under local alternatives and asymptotically equivalent to the score statistic based on a stratified logistic regression framework.

**Meta-analysis for autosomal SNPs.** For each SNP, let  $Z_{GAIN}, Z_{GenRED}, Z_{StarD}$  denote the Wald Z test statistics from the logistic regression analyses for GAIN-MDD, GenRED and STAR\*D respectively,



correcting for population stratification appropriately. Under the null hypothesis, these Z statistics follow the standard normal distribution  $N(0, 1)$ . Because GenRED and STAR\*D share control samples,  $Z_{GenRED}$  and  $Z_{StarD}$  are correlated with asymptotic correlation

$$\rho = \frac{1}{\left[ \frac{N_{share}}{n_{StarD}} + 1 \right]^{1/2} \left[ \frac{N_{share}}{n_{GenRED}} + 1 \right]^{1/2}} \quad (1)$$

Here,  $N_{share} = 1636$  is the number of overlapping controls,  $n_{StarD}, n_{GenRED}$  are the numbers of cases in STAR\*D and GenRED, respectively. **Table S2** gives the asymptotically correlation between  $Z_{GenRED}$  and  $Z_{StarD}$  based on (1). The correlations are slightly different for X chromosome SNPs and for autosomal SNPs because additional subjects were excluded from X chromosome analysis.

**Table S2: Asymptotic correlation between Z-score test statistics of GenRED and STAR\*D due to shared controls**

|                          |                             | males+females | males only | females only |
|--------------------------|-----------------------------|---------------|------------|--------------|
| <b>Autosomal SNPs</b>    | <b>Broad case analysis</b>  | 0.405         | 0.295      | 0.500        |
|                          | <b>Narrow case analysis</b> | 0.340         | 0.238      | 0.434        |
| <b>X chromosome SNPs</b> | <b>Broad case analysis</b>  | 0.406         | 0.291      | 0.508        |
|                          | <b>Narrow case analysis</b> | 0.341         | 0.234      | 0.440        |

We then define a correlation matrix

$$\Sigma = \begin{pmatrix} 1 & 0 & 0 \\ 0 & 1 & \rho \\ 0 & \rho & 1 \end{pmatrix}$$

One can show that the three test statistics ( $Z_{GAIN}, Z_{GenRED}, Z_{StarD}$ ) follow a multivariate normal distribution with correlation matrix  $\Sigma$  asymptotically.

The meta-analysis statistic is then computed as:

$$Z = \frac{(\eta_{GAIN}, \eta_{GenRED}, \eta_{StarD}) \Sigma^{-1} (Z_{GAIN}, Z_{GenRED}, Z_{StarD})^t}{\left[ (\eta_{GAIN}, \eta_{GenRED}, \eta_{StarD}) \Sigma^{-1} (\eta_{GAIN}, \eta_{GenRED}, \eta_{StarD})^t \right]^{1/2}} \quad (2)$$

Here,

$$\eta_k = [n_k \phi_k (1 - \phi_k)]^{1/2} [2 p_k (1 - p_k)]^{1/2} r_k$$

is proportional to the asymptotic non-centrality parameter (NCP) of the Wald Z test statistic for study k;  $n_k$  is the total sample size of study k,  $\phi_k$  is the proportion of cases,  $p_k$  is the allele frequency of the

controls and  $r_k \in [0,1]$  is the correlation between imputed genotype dosage and real genotypic value for the SNP. Under the null hypothesis that the SNP is unassociated with the disease, the statistic Z follows the standard normal distribution. Under local alternative hypothesis that the relative risk is close to one, the proposed meta-analysis statistic is the most powerful asymptotically.

The genomic control  $\lambda$  values for each individual study and for the meta-analysis are shown in **Figures S8-S11** above. The lack of any substantial inflation of test statistics demonstrates the validity of our approach.

The  $\beta$  value (note that  $OR = \exp(\beta)$ ) for the meta-analysis is again the weighted average of  $\beta$ s of three studies, with weights depending on sample sizes, allele frequencies, imputation information content and the correlation structure. Formally, we have approximately:

$$\beta = \frac{(\eta_{GAIN}, \eta_{GenRED}, \eta_{StarD}) \Sigma^{-1} (\eta_{GAIN} \beta_{GAIN}, \eta_{GenRED} \beta_{GenRED}, \eta_{StarD} \beta_{StarD})^t}{[(\eta_{GAIN}, \eta_{GenRED}, \eta_{StarD}) \Sigma^{-1} (\eta_{GAIN}, \eta_{GenRED}, \eta_{StarD})^t]}$$

The OR for meta-analysis is then  $OR = \exp(\beta)$ .

**Comparison of the power of two meta-analysis strategies.** A simpler alternative to correcting meta-analytically for the shared controls in GenRED and STAR\*D would be to randomly assign subsets of controls to each of these two studies (perhaps proportionally to the case sample size). Here we compare the power of such a *split-controls* approach to our *corrected meta-analysis* approach. By theoretical power calculation, we found that the two strategies were equally powerful if a SNP's imputation information content was the same for each dataset. However, **if the SNP was imputed with high confidence in GenRED and low confidence in STAR\*D, then the corrected meta-analysis method was more powerful.** Here we describe the power analysis that led to this conclusion. For convenience, we only consider meta-analysis of GenRED study and STAR\*D. We compute the non-centrality parameter of the statistics in two strategies.

**Strategy 1 (split controls):** We randomly select 899 MGS control subjects for STAR\*D and 737 MGS control subjects for GenRED such that the case proportion is 58% in both datasets. The test statistics for two studies are independent. For each study, the NCP of a trend statistic (Z) can be approximated by

$$\eta_k = [n_k \phi_k (1 - \phi_k)]^{1/2} [2 p_k (1 - p_k)]^{1/2} r_k$$

If the statistics are  $Z_1$  and  $Z_2$  in two studies, the meta-analysis test statistic is given by

$$Z = (\eta_1 Z_1 + \eta_2 Z_2) / \sqrt{\eta_1^2 + \eta_2^2} \text{ and the NCP of } Z \text{ is proportional to } \Omega_1 = \sqrt{\eta_1^2 + \eta_2^2}.$$

**Strategy 2 (shared controls with meta-analytic correction):** Both GenRED study and STAR\*D study use 1,636 MGS controls. The test statistic is correlated with correlation 0.407 (see Table S2). If we define a correlation matrix

$$\Sigma = \begin{pmatrix} 1 & 0.407 \\ 0.407 & 1 \end{pmatrix}$$

then, the same argument in the derivation of meta-analysis statistic leads to the meta-analysis test statistic:

$$Z = (\eta_1, \eta_2) \Sigma^{-1} (Z_1, Z_2)' / [(\eta_1, \eta_2) \Sigma^{-1} (\eta_1, \eta_2)']^{1/2}$$

Its NCP is proportional to  $\Omega_2 = [(\eta_1, \eta_2) \Sigma^{-1} (\eta_1, \eta_2)']^{1/2}$ .

We define a metric  $\Delta = 1 - [\Omega_1 / \Omega_2]^2$  which measures the relative power loss for using strategy 1 compared to strategy 2. One can show that  $\Delta = 1$  if the imputation information content  $r_1 = r_2$  and  $\Delta < 1$  otherwise.

**Figure S12** gives the relative power loss of Strategy 1 compared with Strategy 2, for each combination of  $(r_1, r_2)$ , assuming that the two studies are from the same population and thus have identical allele

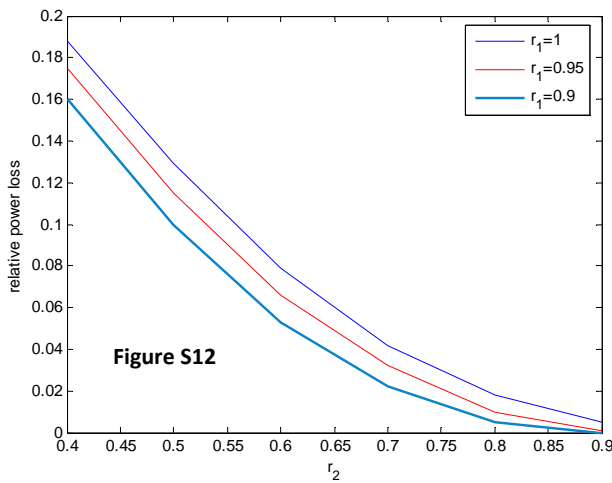

frequencies (same ancestry). Here,  $r_1^2, r_2^2$  represent the imputation information content of a SNP for GenRED and STAR\*D, respectively. The figure gives the relative power loss for  $r_1 = 1, 0.95, 0.9$  and  $r_2$  ranging from 0.4 to 0.9. The relative power loss is small if the imputation information contents are similar. But when  $r_1$  is large and  $r_2$  is small which is true for many tested SNPs, the relative power loss is not negligible. Note, however, that information content is expressed here as  $r$ . For the more familiar  $r^2$  statistic, power loss remains  $< 5\%$  until  $r^2$  for the less informative study drops well below 0.5 ( $r < 0.7$ ).

Thus there may be situations where the strategy of splitting the control sample among studies might be acceptable.

### c. Power analyses.

**GenRED and Meta-analysis.** For each combination of allele frequency ( $p$ ) and allele relative risk ( $R$ ), we computed the power of the two-side test statistic for detecting additive genetic effect assuming that relative risks and allele frequencies are consistent across three studies. In the computation, we also assume that the SNP is genotyped or imputed perfectly, so the power represents the upper limit of the real power after imputation. Because  $r^2$  is close to 1 for most of the imputed SNPs, the real power is close to the computed power. For the meta-analysis, the power was computed based on the number of cases/controls for GAIN, GenRED and STAR\*D, accounting for the fact that GenRED and STAR\*D shared 1636 MGS controls.

The power is approximated under the assumption that the test statistic Z follows a normal distribution with NCP  $\xi$  and unit variance. The power is computed at significance level  $\alpha = 5 \times 10^{-8}$ :

$P_{\xi}(|Z| > q_{\alpha/2} = 5.45)$ . Given p, R and number of cases/controls, the asymptotic NCP of the trend test for each study is given by

$$\xi_k = [2n_k \phi_k (1 - \phi_k)]^{1/2} [p(1-p)]^{1/2} \frac{(R-1)}{1+p(R-1)}$$

One can show that the NCP of the meta-analysis statistic is reduced to

$$\xi = [(\eta_{GAIN}, \eta_{GenRED}, \eta_{StarD}) \Sigma^{-1} (\eta_{GAIN}, \eta_{GenRED}, \eta_{StarD})^t]^{1/2} \frac{(R-1)}{1+p(R-1)}$$

**Table S3** shows the results of power calculations for the GenRED GWAS, while Table S4 shows the results of power calculations for the Broad and Narrow meta-analyses.

**Table S3: Power of GenRED GWAS dataset**

| Risk allele freq→<br>GRR↓ | 0.05 | 0.10 | 0.15 | 0.20 | 0.25 | 0.30 | 0.40 | 0.50 | 0.60 | 0.70 | 0.80 | 0.90 |
|---------------------------|------|------|------|------|------|------|------|------|------|------|------|------|
| <b>ALL SUBJECTS</b>       |      |      |      |      |      |      |      |      |      |      |      |      |
| 1.20                      | 0.00 | 0.00 | 0.00 | 0.00 | 0.01 | 0.01 | 0.01 | 0.01 | 0.01 | 0.00 | 0.00 | 0.00 |
| 1.25                      | 0.00 | 0.00 | 0.01 | 0.02 | 0.03 | 0.05 | 0.07 | 0.07 | 0.05 | 0.02 | 0.01 | 0.00 |
| 1.30                      | 0.00 | 0.01 | 0.03 | 0.08 | 0.12 | 0.16 | 0.21 | 0.20 | 0.15 | 0.08 | 0.02 | 0.00 |
| 1.35                      | 0.00 | 0.03 | 0.11 | 0.21 | 0.30 | 0.38 | 0.45 | 0.43 | 0.33 | 0.19 | 0.06 | 0.00 |
| 1.40                      | 0.01 | 0.09 | 0.25 | 0.42 | 0.55 | 0.64 | 0.70 | 0.68 | 0.56 | 0.35 | 0.12 | 0.01 |
| 1.45                      | 0.02 | 0.19 | 0.45 | 0.66 | 0.78 | 0.84 | 0.88 | 0.86 | 0.76 | 0.54 | 0.22 | 0.02 |
| 1.50                      | 0.05 | 0.35 | 0.67 | 0.84 | 0.91 | 0.95 | 0.96 | 0.95 | 0.89 | 0.71 | 0.35 | 0.04 |
| 1.55                      | 0.09 | 0.54 | 0.84 | 0.94 | 0.98 | 0.99 | 0.99 | 0.99 | 0.96 | 0.84 | 0.49 | 0.06 |
| 1.60                      | 0.17 | 0.72 | 0.94 | 0.98 | 0.99 | 1.00 | 1.00 | 1.00 | 0.99 | 0.92 | 0.62 | 0.10 |
| <b>MALES</b>              |      |      |      |      |      |      |      |      |      |      |      |      |
| 1.40                      | 0.00 | 0.00 | 0.00 | 0.01 | 0.02 | 0.02 | 0.03 | 0.03 | 0.02 | 0.01 | 0.00 | 0.00 |
| 1.50                      | 0.00 | 0.01 | 0.03 | 0.06 | 0.09 | 0.11 | 0.13 | 0.11 | 0.07 | 0.03 | 0.01 | 0.00 |
| 1.60                      | 0.00 | 0.03 | 0.10 | 0.18 | 0.25 | 0.31 | 0.34 | 0.29 | 0.19 | 0.09 | 0.02 | 0.00 |
| 1.70                      | 0.01 | 0.10 | 0.26 | 0.40 | 0.51 | 0.57 | 0.59 | 0.52 | 0.37 | 0.19 | 0.05 | 0.00 |
| 1.80                      | 0.03 | 0.23 | 0.48 | 0.66 | 0.75 | 0.79 | 0.80 | 0.73 | 0.57 | 0.32 | 0.09 | 0.01 |
| 1.90                      | 0.07 | 0.42 | 0.71 | 0.85 | 0.90 | 0.92 | 0.92 | 0.87 | 0.73 | 0.47 | 0.16 | 0.01 |
| 2.00                      | 0.15 | 0.63 | 0.87 | 0.95 | 0.97 | 0.98 | 0.98 | 0.95 | 0.85 | 0.61 | 0.23 | 0.02 |
| <b>FEMALES</b>            |      |      |      |      |      |      |      |      |      |      |      |      |
| 1.30                      | 0.00 | 0.00 | 0.00 | 0.01 | 0.01 | 0.02 | 0.03 | 0.03 | 0.02 | 0.01 | 0.00 | 0.00 |
| 1.40                      | 0.00 | 0.01 | 0.03 | 0.07 | 0.11 | 0.14 | 0.18 | 0.16 | 0.11 | 0.05 | 0.01 | 0.00 |
| 1.50                      | 0.00 | 0.05 | 0.16 | 0.28 | 0.39 | 0.46 | 0.51 | 0.47 | 0.35 | 0.18 | 0.05 | 0.00 |
| 1.60                      | 0.02 | 0.19 | 0.43 | 0.62 | 0.73 | 0.79 | 0.82 | 0.77 | 0.64 | 0.40 | 0.14 | 0.01 |
| 1.70                      | 0.07 | 0.43 | 0.73 | 0.87 | 0.93 | 0.95 | 0.96 | 0.93 | 0.85 | 0.63 | 0.26 | 0.02 |
| 1.80                      | 0.17 | 0.70 | 0.92 | 0.97 | 0.99 | 0.99 | 0.99 | 0.99 | 0.95 | 0.80 | 0.41 | 0.04 |
| 1.90                      | 0.34 | 0.88 | 0.98 | 1.00 | 1.00 | 1.00 | 1.00 | 1.00 | 0.99 | 0.91 | 0.57 | 0.07 |
| 2.00                      | 0.55 | 0.97 | 1.00 | 1.00 | 1.00 | 1.00 | 1.00 | 1.00 | 1.00 | 0.96 | 0.70 | 0.11 |

**Table S4** shows power calculations for the meta-analyses of Broad and Narrow phenotypes.

**Table S4: Power of the Broad and Narrow meta-analyses (all subjects).**

| Risk allele frq→<br>GRR↓ | 0.05 | 0.10 | 0.15 | 0.20 | 0.25 | 0.30 | 0.40 | 0.50 | 0.60 | 0.70 | 0.80 | 0.90 |
|--------------------------|------|------|------|------|------|------|------|------|------|------|------|------|
| <b>BROAD</b>             |      |      |      |      |      |      |      |      |      |      |      |      |
| 1.10                     | 0.00 | 0.00 | 0.00 | 0.01 | 0.01 | 0.02 | 0.02 | 0.03 | 0.02 | 0.01 | 0.00 | 0.00 |
| 1.12                     | 0.00 | 0.00 | 0.01 | 0.02 | 0.04 | 0.06 | 0.10 | 0.10 | 0.08 | 0.05 | 0.01 | 0.00 |
| 1.14                     | 0.00 | 0.01 | 0.03 | 0.08 | 0.13 | 0.19 | 0.26 | 0.27 | 0.22 | 0.13 | 0.04 | 0.00 |
| 1.16                     | 0.00 | 0.03 | 0.09 | 0.20 | 0.30 | 0.39 | 0.50 | 0.51 | 0.44 | 0.29 | 0.11 | 0.01 |
| 1.18                     | 0.01 | 0.06 | 0.21 | 0.38 | 0.53 | 0.64 | 0.74 | 0.75 | 0.67 | 0.49 | 0.21 | 0.02 |
| 1.20                     | 0.01 | 0.14 | 0.38 | 0.60 | 0.74 | 0.83 | 0.90 | 0.90 | 0.85 | 0.69 | 0.37 | 0.05 |
| <b>NARROW</b>            |      |      |      |      |      |      |      |      |      |      |      |      |
| 1.10                     | 0.00 | 0.00 | 0.00 | 0.00 | 0.00 | 0.00 | 0.01 | 0.01 | 0.00 | 0.00 | 0.00 | 0.00 |
| 1.14                     | 0.00 | 0.00 | 0.01 | 0.02 | 0.03 | 0.05 | 0.07 | 0.07 | 0.06 | 0.03 | 0.01 | 0.00 |
| 1.18                     | 0.00 | 0.01 | 0.05 | 0.11 | 0.19 | 0.25 | 0.34 | 0.34 | 0.28 | 0.17 | 0.05 | 0.00 |
| 1.22                     | 0.01 | 0.07 | 0.21 | 0.38 | 0.53 | 0.63 | 0.73 | 0.73 | 0.64 | 0.46 | 0.19 | 0.02 |
| 1.26                     | 0.02 | 0.21 | 0.50 | 0.72 | 0.84 | 0.90 | 0.95 | 0.94 | 0.90 | 0.76 | 0.43 | 0.06 |
| 1.30                     | 0.07 | 0.46 | 0.79 | 0.93 | 0.97 | 0.99 | 0.99 | 0.99 | 0.98 | 0.93 | 0.68 | 0.13 |

**STAR\*D GWAS power analysis.** A separate power analysis was carried out for STAR\*D GWAS analysis (see text of STAR\*D/meta-analysis paper). In Figure S13, each power curve depicted below is specific to a given MAF (minor allele frequency), as shown in the legend to the right.

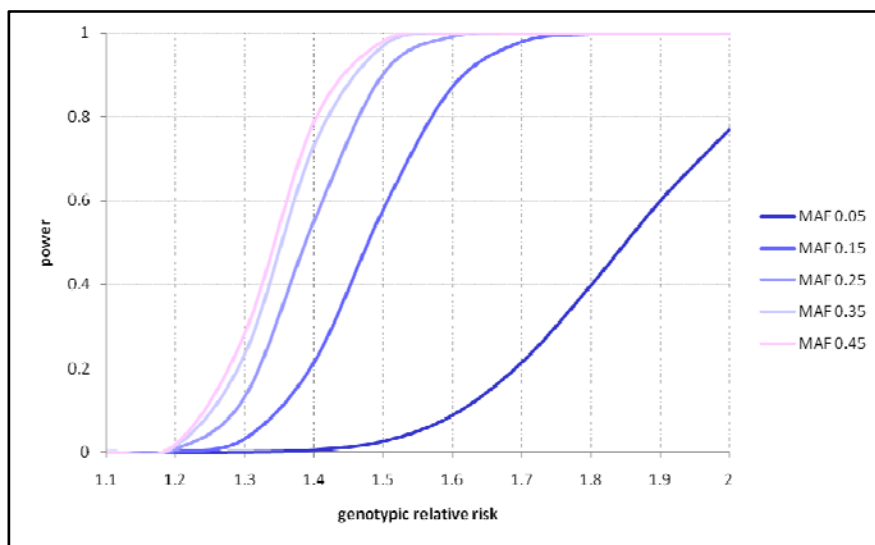

**Figure S13.** Power analysis of STAR\*D GWAS.

#### 4. SUPPLEMENTARY RESULTS

**a. Analysis of 41 mood disorder candidate genes: methods and results.** For the GenRED, Broad meta-analysis and Narrow meta-analysis, we examined results for all genotyped and imputed SNPs within (or alternatively, within 50kb of) the transcribed regions of 41 genes that have previously been mentioned in the literature as possible MDD candidate genes (listed in **Table S5**, below). These included the top GWAS findings of Muglia et al.<sup>12</sup> (ADCY9, CHST11, DNAJB2, EHD3, FREM3, HS6ST3, ITPR1, KLHL29,

LHFPL2, PHACTR3, PTPRR, ROS1, SLC25A21, UGT2A1, VGLL4); 6 genes identified by a recent meta-analysis as having significant support across published candidate gene studies, although without genome-wide correction (APOE, DRD4, GNB3, MTHFR, SLC6A3, SLC6A4), and additional genes identified in previous reports or literature search.<sup>13, 14</sup>

**Table S5: 41 previously-studied candidate genes**

|         |                                               |          |                                                                             |
|---------|-----------------------------------------------|----------|-----------------------------------------------------------------------------|
| ADCY9   | adenylate cyclase 9                           | KLHL29   | kelch-like 29 (Drosophila)                                                  |
| ANK3    | ankyrin 3                                     | MMP2     | matrix metalloproteinase 2 preproprotein                                    |
| APOE†   | apolipoprotein E                              | MTHFR    | 5,10-methylenetetrahydrofolate reductase                                    |
| BDNF    | brain-derived neurotrophic factor             | MYO5B    | myosin VB                                                                   |
| CACNA1C | calcium channel, voltage-dependent, L type    | NFE2L3   | nuclear factor (erythroid-derived 2)-like 3                                 |
| CCND2   | cyclin D2                                     | NFKB1    | nuclear factor kappa-B, subunit 1                                           |
| CD47    | CD47 antigen isoform 1 precursor              | NTRK3    | neurotrophic tyrosine kinase, receptor, type 3                              |
| CHST11  | carbohydrate (chondroitin 4) sulfotransferase | PHACTR3  | phosphatase and actin regulator 3                                           |
| COMT    | catechol-O-methyltransferase                  | PTPRR    | protein tyrosine phosphatase, receptor type R                               |
| DGKH    | diacylglycerol kinase, eta                    | ROS1     | proto-oncogene c-ros-1 protein precursor                                    |
| DNAJB2  | DnaJ (Hsp40) homolog, subfamily B, member 2   | SLC25A21 | solute carrier family 25 (mitochondrial)                                    |
| DRD3    | dopamine receptor D3                          | SLC6A3   | solute carrier family 6 (neurotransmitter transporter, dopamine), member 3  |
| DRD4†   | dopamine receptor D4                          | SLC6A4   | solute carrier family 6 (neurotransmitter transporter, serotonin), member 4 |
| EHD3    | EH-domain containing 3                        | SMG7     | SMG-7 homolog isoform 1                                                     |
| FBXO8   | F-box only protein 8, F-box only protein 8    | SYN3     | synapsin III                                                                |
| GABBR1  | gamma-aminobutyric acid (GABA) B receptor 1   | TDRD3    | tudor domain containing 3                                                   |
| GNB3    | guanine nucleotide-binding protein, beta-3    | TPH2     | neuronal tryptophan hydroxylase                                             |
| HS6ST3  | heparan sulfate 6-O-sulfotransferase 3        | TSPAN8   | transmembrane 4 superfamily member 3                                        |
| HTR2A   | 5-hydroxytryptamine (serotonin) receptor 2A   | UGT2A1   | UDP glycosyltransferase 2 family, polypeptide                               |
| ITPR1   | inositol 1,4,5-triphosphate receptor, type 1  | VGLL4    | vestigial like 4                                                            |
| KCNC2   | Shaw-related voltage-gated potassium channel  |          |                                                                             |

†APOE and DRD4 were not included in the aggregate analysis because there were no SNPs within the genes.

In addition, we carried an analysis to determine the gene-wide significance of the best SNP result in each gene, and also to determine whether the entire distribution of gene-wide *P*-values for all of the genes included more significant values than would be expected by chance. Because STAR\*D was not independent due to the overlapping controls, we show only results for genotyped SNPs for that dataset, and did not carry out a gene-wide or aggregate analysis.

We derived the null distribution based on the 2656 GenRED samples, by permuting the case-control status of the samples 5000 times and performing a trend test for SNPs in the candidate gene regions for each permutation. (We used this null distribution as a reasonable approximation for the meta-analysis datasets as well, because the distribution depends primarily on the LD pattern among SNPs.) Then, for each dataset, we then considered the entire observed aggregate distribution of results in these regions. (The aggregate analyses of SNPs included 39 genes, because there were no SNPs within APOE and DRD4.) This requires a gene-based permutation procedure to take into account the varying gene lengths and densities of SNPs per gene, as well as possible correlation among genes. For example, the longer genes have a larger probability to have low *p*-values by chance. We computed an **empirical gene-wide *P*-value** for each gene and then tested whether the 39 empirical *p*-values **in aggregate** follow the uniform distribution (0, 1):

1. Let  $P_{ij}$  be the observed nominal probability of SNP  $j$  in candidate gene  $i$  in the sample. Let  $q_i = \min_j P_{ij}$  be the minimum nominal p-value for gene  $i$ .
2. Let  $p_{ij}(k)$  be the nominal probability of SNP  $j$  in candidate gene  $i$  in permutation  $k$ . Let  $q_i(k) = \min_j p_{ij}(k)$  be the minimum nominal p-value for gene  $i$  in permutation  $k$ .
3. The empirical gene-wide p-value  $GP(i)$  for gene  $i$  is defined as the proportion of permutations that generates  $q_i(k)$  less than the observed  $q_i$ .
4. We transformed  $GP(i)$  to normal quantile  $Z(i)$  and then computed a test statistic to test if the mean of the Z scores equals to zero. In this case,  $T = (Z(1) + \dots + Z(39)) / \sqrt{39 \text{var}(Z)}$ .
5. For each permutation, we can calculate a T statistic using the same procedure in step 2-4.

Results are summarized below. More detailed results are available in candidate\_gene\_results.xls.

**GenRED candidate gene analyses.** Table S6 shows GenRED results for the best SNP in each gene (within 50 kb) and its empirical gene-wide  $P$ -value (marked in red are best SNP results with  $P < 0.001$ , or genewise  $P < 0.05$ ). The lowest nominal  $P$ -value ( $6.69E-5$ ) was observed for SNP rs11614275 in CACNA1C. Its empirical gene-wide  $P$ -value was estimated to be 0.0198; if one corrects this value for testing 39 genes, no SNP reaches the threshold of significance in GenRED samples. Similarly, for the aggregate test of the distribution of 39 gene-wide  $P$ -values, the GenRED results did not deviate significantly from the null distribution, whether we considered only SNPs within transcribed regions, or SNPs within 50kb of these regions. Thus, there was no evidence that these genes contained more significant results than expected by chance.

**Table S6: Candidate gene analysis of GenRED sample**

| Gene     | #SNPs | Best SNP   | Gene-wide |          | Gene    | #SNPs | Best SNP   | Gene-wide |          |
|----------|-------|------------|-----------|----------|---------|-------|------------|-----------|----------|
|          |       |            | $P$       | $P$      |         |       |            | $P$       | $P$      |
| CACNA1C  | 682   | rs11614275 | 6.69E-05  | 1.98E-02 | SMG7    | 97    | rs12032165 | 1.40E-02  | 3.82E-01 |
| ADCY9    | 186   | rs7195913  | 2.14E-04  | 2.48E-02 | PTPRR   | 434   | rs11613970 | 1.43E-02  | 7.69E-01 |
| SYN3     | 807   | rs3788477  | 5.50E-04  | 1.18E-01 | PHACTR3 | 375   | rs6070855  | 1.50E-02  | 6.89E-01 |
| TPH2     | 213   | rs7955650  | 7.91E-04  | 5.28E-02 | ITPR1   | 602   | rs2686621  | 1.51E-02  | 7.16E-01 |
| EHD3     | 224   | rs13425772 | 9.84E-04  | 6.94E-02 | GNB3    | 34    | rs1075836  | 1.87E-02  | 3.30E-01 |
| ANK3     | 546   | rs10821712 | 1.52E-03  | 1.65E-01 | HTR2A   | 221   | rs9534518  | 1.91E-02  | 5.78E-01 |
| NTRK3    | 398   | rs10220910 | 1.75E-03  | 5.72E-02 | SLC6A3  | 116   | rs40180    | 1.97E-02  | 5.12E-01 |
| ROS1     | 267   | rs2229078  | 1.85E-03  | 8.90E-02 | TSPAN8  | 120   | rs1397558  | 2.16E-02  | 3.58E-01 |
| CHST11   | 520   | rs4964792  | 1.93E-03  | 2.53E-01 | TDRD3   | 227   | rs7317551  | 3.25E-02  | 8.24E-01 |
| HS6ST3   | 703   | rs867017   | 2.16E-03  | 4.19E-01 | DGKH    | 404   | rs1170097  | 3.79E-02  | 9.97E-01 |
| NFKB1    | 193   | rs4648090  | 2.19E-03  | 9.48E-02 | UGT2A1  | 202   | rs11249456 | 3.89E-02  | 7.31E-01 |
| DRD3     | 142   | rs9869286  | 3.39E-03  | 2.51E-01 | NFE2L3  | 75    | rs916964   | 4.58E-02  | 5.68E-01 |
| VGLL4    | 290   | rs6780610  | 3.81E-03  | 2.54E-01 | APOE    | 49    | rs5157     | 5.21E-02  | 6.45E-01 |
| SLC25A21 | 743   | rs1884777  | 4.04E-03  | 4.56E-01 | GABBR1  | 198   | rs2745412  | 5.49E-02  | 8.86E-01 |
| CCND2    | 98    | rs7953609  | 5.20E-03  | 1.94E-01 | COMT    | 131   | rs5993891  | 5.97E-02  | 7.91E-01 |
| KLHL29   | 490   | rs2288698  | 5.24E-03  | 4.74E-01 | KCNC2   | 252   | rs735637   | 7.07E-02  | 8.21E-01 |
| MMP2     | 212   | rs837543   | 8.14E-03  | 2.19E-01 | CD47    | 119   | rs17827026 | 7.30E-02  | 8.42E-01 |
| MYO5B    | 650   | rs10853589 | 1.06E-02  | 6.97E-01 | SLC6A4  | 75    | rs4493117  | 7.52E-02  | 7.34E-01 |
| BDNF     | 99    | rs6265     | 1.11E-02  | 2.53E-01 | FBXO8   | 78    | rs7699938  | 8.80E-02  | 8.75E-01 |
| DNAJB2   | 48    | rs2090163  | 1.14E-02  | 3.74E-01 | DRD4    | 41    | rs6598004  | 1.40E-01  | 9.31E-01 |
| MTHFR    | 136   | rs4845882  | 1.35E-02  | 2.21E-01 |         |       |            |           |          |

**STAR\*D candidate gene analysis.** Shown below (Table S7) are results in these candidate genes in the STAR\*D GWAS (considering only genotyped SNPs, within the open reading frame or within 50 kb ).

**Table S7: Candidate gene results for STAR\*D GWAS**

| Gene     | chr | # SNPs | best SNP   | p-value  | gene   | chr | #SNPs | best SNP   | p-value  |
|----------|-----|--------|------------|----------|--------|-----|-------|------------|----------|
| SYN3     | 22  | 99     | rs3788477  | 1.64E-04 | DGKH   | 13  | 36    | rs10492433 | 8.66E-02 |
| ROS1     | 6   | 27     | rs12332810 | 9.37E-03 | ANK3   | 10  | 59    | rs3750800  | 8.74E-02 |
| FBXO8    | 4   | 6      | rs17060468 | 1.29E-02 | SLC6A4 | 17  | 5     | rs2020939  | 9.91E-02 |
| KLHL29   | 2   | 18     | rs3795933  | 1.56E-02 | MTHFR  | 1   | 15    | rs4845882  | 1.07E-01 |
| PTPRR    | 12  | 47     | rs17226724 | 2.25E-02 | HS6ST3 | 13  | 60    | rs7318798  | 1.14E-01 |
| CACNA1C  | 12  | 78     | rs2370419  | 2.29E-02 | TSPAN8 | 12  | 11    | rs10506625 | 1.39E-01 |
| CD47     | 3   | 17     | rs7635063  | 2.41E-02 | TPH2   | 12  | 27    | rs7955650  | 1.40E-01 |
| COMT     | 22  | 14     | rs5993875  | 2.82E-02 | EHD3   | 2   | 22    | rs6543616  | 1.48E-01 |
| SLC25A21 | 14  | 80     | rs17105237 | 2.92E-02 | CCND2  | 12  | 14    | rs3217805  | 1.59E-01 |
| VGLL4    | 3   | 45     | rs13075818 | 3.30E-02 | HTR2A  | 13  | 29    | rs666693   | 1.63E-01 |
| MYO5B    | 18  | 76     | rs4939921  | 3.31E-02 | MMP2   | 16  | 23    | rs4783894  | 1.74E-01 |
| BDNF     | 11  | 11     | rs6265     | 4.56E-02 | APOE   | 19  | 5     | rs519113   | 1.96E-01 |
| SLC6A3   | 5   | 17     | rs10053602 | 4.74E-02 | DRD3   | 3   | 10    | rs9824256  | 1.96E-01 |
| ADCY9    | 16  | 31     | rs2230742  | 4.95E-02 | SMG7   | 1   | 12    | rs2702182  | 2.22E-01 |
| NTRK3    | 15  | 57     | rs7175941  | 5.43E-02 | KCNC2  | 12  | 20    | rs1526806  | 2.72E-01 |
| UGT2A1   | 4   | 26     | rs7674562  | 6.11E-02 | TDRD3  | 13  | 8     | rs9538757  | 2.89E-01 |
| PHACTR3  | 20  | 35     | rs6070961  | 6.24E-02 | NFKB1  | 4   | 20    | rs4699030  | 3.60E-01 |
| DNAJB2   | 2   | 4      | rs12694457 | 6.68E-02 | GNB3   | 12  | 5     | rs1075835  | 4.66E-01 |
| GABBR1   | 6   | 23     | rs1233405  | 6.71E-02 | NFE2L3 | 7   | 4     | rs2391265  | 6.63E-01 |
| ITPR1    | 3   | 87     | rs876349   | 7.11E-02 | DRD4   | 11  | 3     | rs7123677  | 7.58E-01 |
| CHST11   | 12  | 70     | rs17035879 | 8.62E-02 |        |     |       |            |          |

**Meta-analysis.** We repeated the analyses described above (for GenRED) in the Broad and Narrow meta-analysis datasets (genotyped and imputed SNPs). Table S8 summarizes the best results (best SNP  $P < 0.001$ , or genewise  $P < 0.05$ ), with further details in candidate\_gene\_results.xls. As was the case for GenRED, the distribution of gene-wide  $P$ -values did not deviate significantly from the null distribution for SNPs within genes or within 50 kb.

**Table S8: Best candidate gene results in Broad and Narrow meta-analyses**

| Gene                        | SNPs within transcribed region |            |          |             | Gene     | SNPs within 50kb of the gene |            |          |             |
|-----------------------------|--------------------------------|------------|----------|-------------|----------|------------------------------|------------|----------|-------------|
|                             | #SNPs                          | Best SNP   | P        | Gene-wide P |          | #SNPs                        | Best SNP   | P        | Gene-wide P |
| <b>Narrow Meta-analysis</b> |                                |            |          |             |          |                              |            |          |             |
| NTRK3                       | 329                            | rs10220910 | 1.61E-03 | 4.92E-02    | NTRK3    | 398                          | rs10220910 | 1.61E-03 | 5.22E-02    |
| SLC25A21                    | 660                            | rs1925685  | 6.70E-04 | 1.01E-01    | SLC25A21 | 743                          | rs1925685  | 6.70E-04 | 1.15E-01    |
| SYN3                        | 658                            | rs16990831 | 5.18E-05 | 1.14E-02    | SYN3     | 807                          | rs16990831 | 5.18E-05 | 1.28E-02    |
| CHST11                      | 400                            | rs7976087  | 3.73E-03 | 3.69E-01    | CHST11   | 520                          | rs2248683  | 2.75E-04 | 4.64E-02    |
| COMT                        | 21                             | rs4633     | 5.45E-03 | 1.42E-02    | COMT     | 131                          | rs4633     | 5.45E-03 | 1.56E-01    |
| <b>Broad Meta-analysis</b>  |                                |            |          |             |          |                              |            |          |             |
| DGKH                        | 303                            | rs369829   | 8.20E-03 | 6.59E-01    | DGKH     | 404                          | rs9590678  | 1.42E-04 | 3.54E-02    |
| EHD3                        | 29                             | rs597800   | 7.06E-03 | 7.12E-02    | EHD3     | 224                          | rs600980   | 2.23E-04 | 2.04E-02    |
| SMG7                        | 30                             | rs12032165 | 1.04E-04 | 1.20E-03    | SMG7     | 97                           | rs12032165 | 1.04E-04 | 5.00E-03    |
| SYN3                        | 658                            | rs3788477  | 1.04E-04 | 2.18E-02    | SYN3     | 807                          | rs3788477  | 1.04E-04 | 2.42E-02    |
| TPH2                        | 142                            | rs12231341 | 9.64E-02 | 9.23E-01    | TPH2     | 213                          | rs7955650  | 1.20E-04 | 1.00E-02    |
| CD47                        | 30                             | rs326346   | 1.93E-02 | 1.61E-01    | CD47     | 119                          | rs17232226 | 5.93E-04 | 2.44E-02    |



**b. Supplementary association analysis results.**

**Manhattan plots** are provided below for male and female analyses of the GenRED GWAS (**Figure S14; see text for all subjects**), the Broad meta-analysis (**Figure S15a**) and the Narrow meta-analysis (**Figure S15b**).

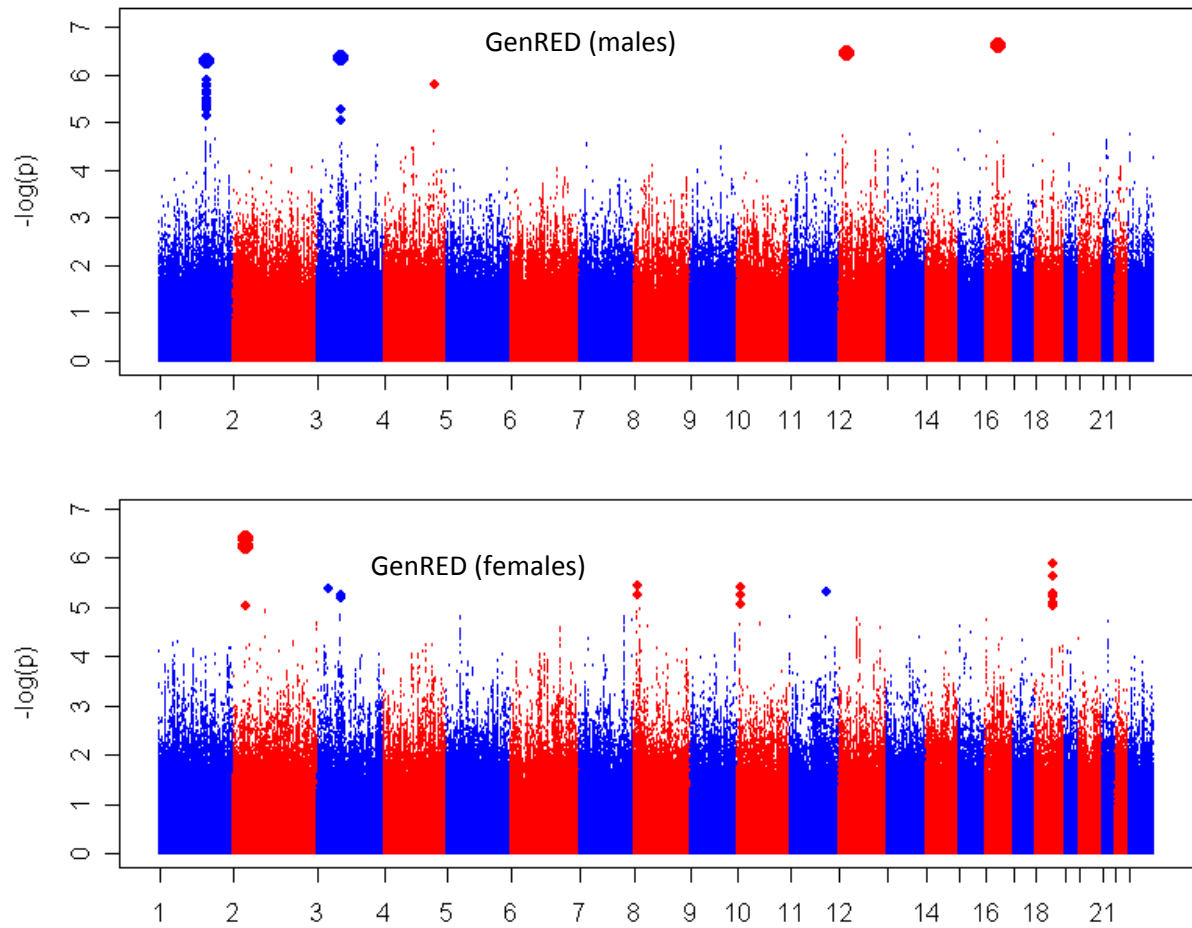

**Figure S14. GenRED GWAS analysis of males and of females: Association test results ( $-\log_{10}[\text{P-value}]$ ).**

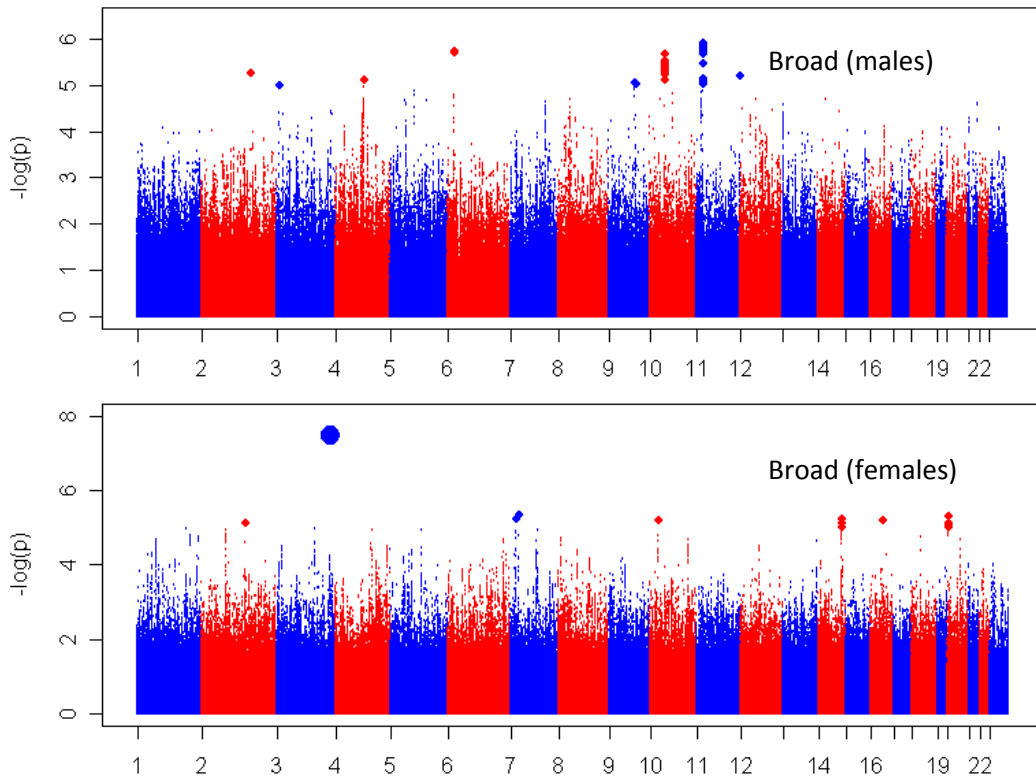

**Figure S15a.** Meta-analysis, Broad males and Broad females. GWAS test results ( $-\log_{10}[\text{P-value}]$ )

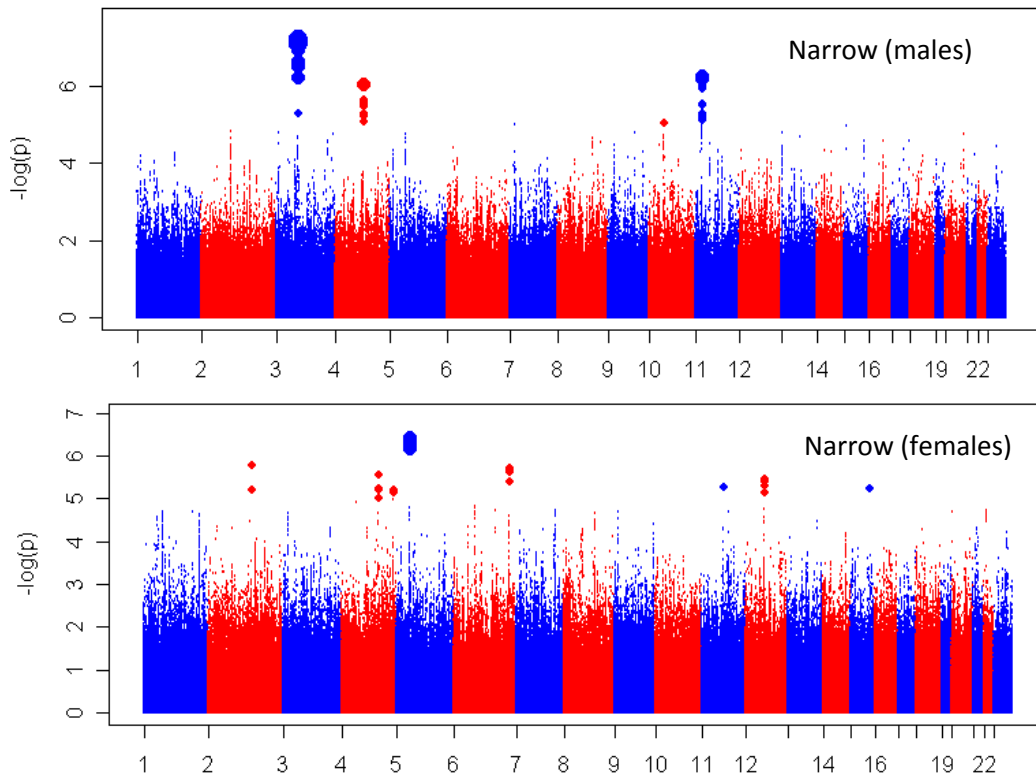

**Figure S15b.** Meta-analysis, Narrow males and Narrow females. GWAS test results ( $-\log_{10}[\text{P-value}]$ )



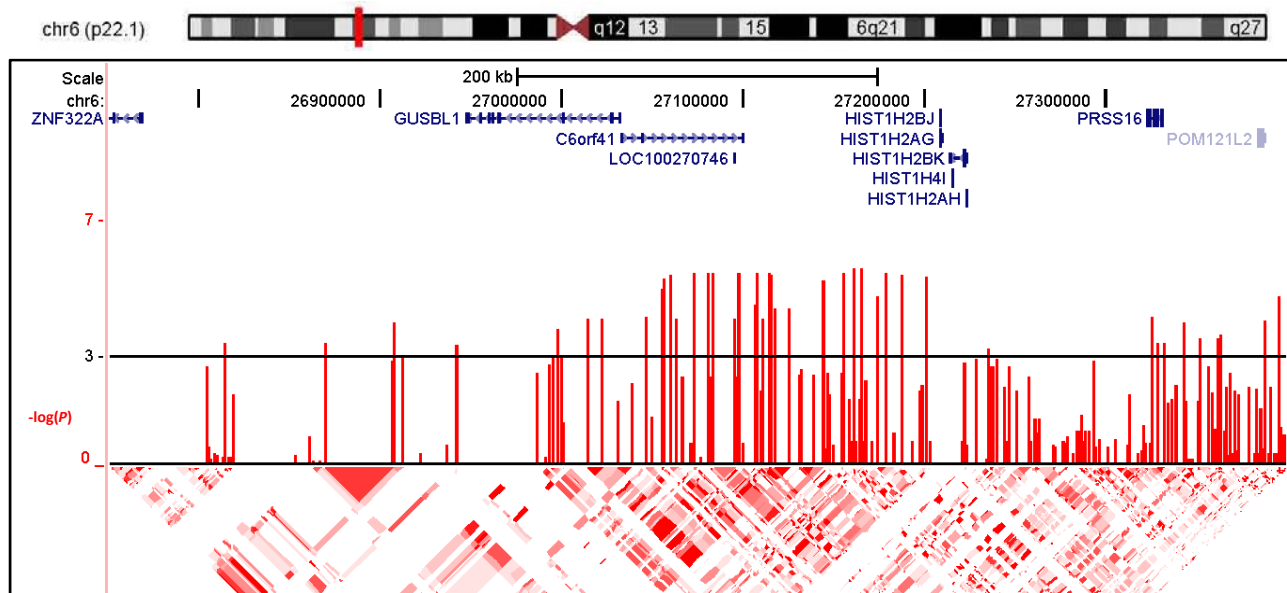

Note that the 6p22.1 peak region is the same LD block reported to be significantly associated with schizophrenia in a GWAS meta-analysis<sup>3</sup> that included the MGS sample (see text), using a superset of the GenRED and STAR\*D controls used here; thus these depression and schizophrenia analyses were not independent. Note also that GUSBL1 (shown in the 6p22.1 plot) is a pseudogene (non-coding sequence).

**Figure S17:** Annotated UCSC browser plots for the regions with the strongest support for association in the analyses of male subjects: 11p15.1 (PLEKHA7) for Broad and 3p14.1 (no annotated genes or mRNAs) for Narrow analyses.

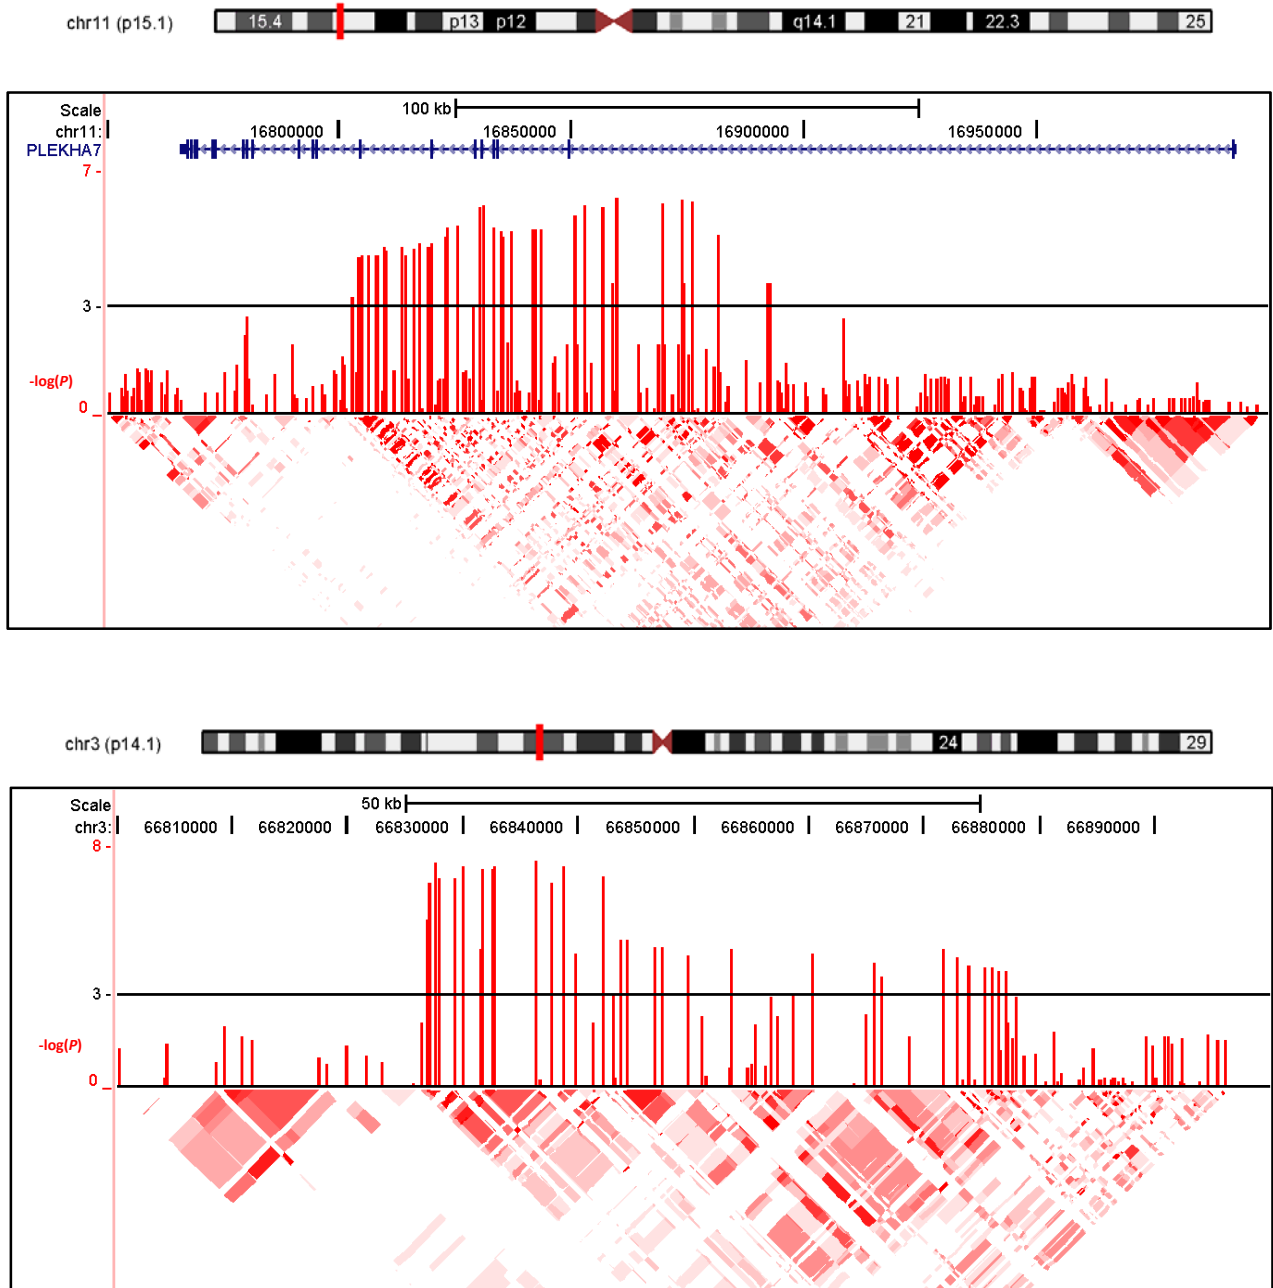

**Figure S18.** Shown are annotated UCSC browser plots for the regions with the strongest support for association in the analyses of **female** subjects: 3q26.32 (no annotated genes) for Broad and 5p13.2 (no annotated genes) for Narrow analyses. See Tables 5 and 6 in the main text.

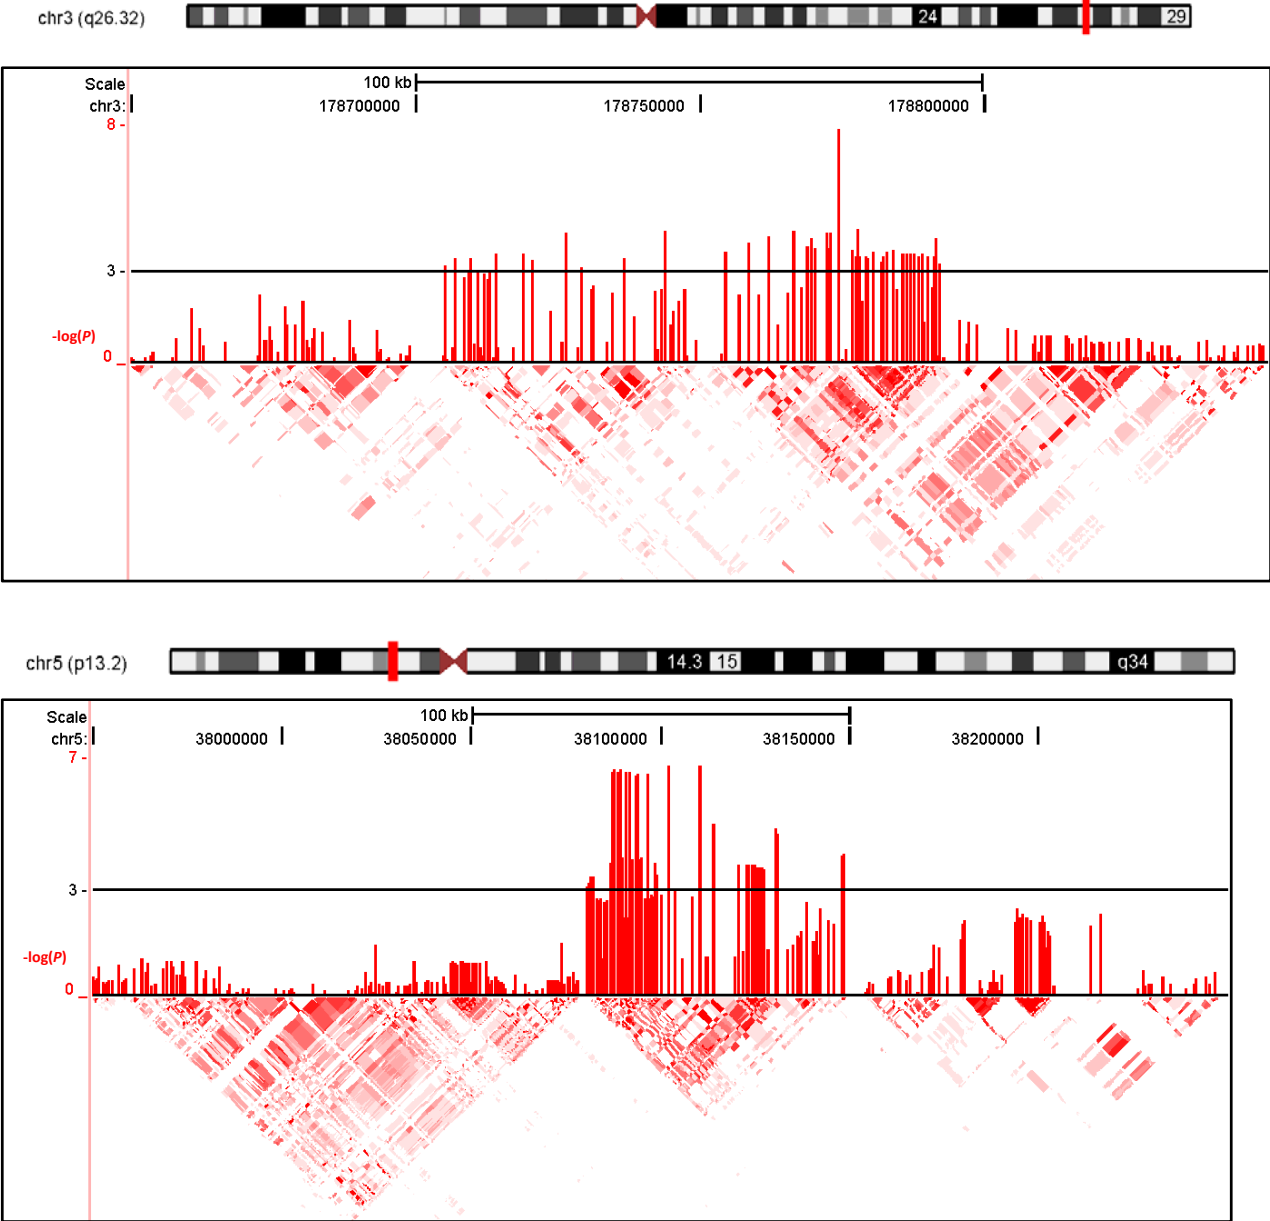

**c. Intensity (cluster) plots.** Please see the separate supplementary file, SNP\_intensity\_cluster\_plots.txt, for cluster plots of the SNPs yielding the best results, or their best tags. That file includes **Tables S9-S10**, and **Figures S19-S21**.

**d. Case-control allele frequencies**

**Table S11: Case-control allele frequencies for best GenRED results (All subjects)**

| Band                  | SNP        | BP       | Alleles | R <sup>2</sup> | Case  | Cont  | OR   | P        |
|-----------------------|------------|----------|---------|----------------|-------|-------|------|----------|
| 18q22.1 <sup>1</sup>  | rs17077540 | 63436259 | A/G     | 0.86           | 0.152 | 0.105 | 1.61 | 1.83E-07 |
| 21q21.2               | rs2828520  | 24064990 | A/G     | 1              | 0.365 | 0.306 | 1.35 | 4.33E-07 |
| 5p13.2 <sup>2</sup>   | rs270545   | 38087350 | A/G     | 1              | 0.754 | 0.689 | 1.37 | 1.03E-06 |
| 1p13.3                | rs6537837  | 1.1E+08  | C/T     | 0.99           | 0.225 | 0.167 | 1.43 | 1.31E-06 |
| 2p23.2                | rs882632   | 29134265 | C/T     | 1              | 0.356 | 0.287 | 1.34 | 2.41E-06 |
| 3p14.2                | rs10514718 | 61388854 | C/G     | 0.82           | 0.965 | 0.940 | 2.12 | 3.96E-06 |
| 1p13.3                | rs12049330 | 1.1E+08  | G/T     | 0.95           | 0.194 | 0.143 | 1.44 | 5.87E-06 |
| 7p15.3                | rs17144465 | 21470952 | A/G     | 1              | 0.066 | 0.036 | 1.82 | 5.97E-06 |
| 13q21.33 <sup>3</sup> | rs9572423  | 69744204 | A/G     | 0.96           | 0.913 | 0.875 | 1.54 | 9.25E-06 |
| 1p33                  | rs1167264  | 49705632 | C/T     | 0.99           | 0.251 | 0.204 | 1.35 | 9.51E-06 |
| 11p15.4               | rs2898938  | 3788833  | G/T     | 1              | 0.768 | 0.716 | 1.34 | 9.60E-06 |
| 11p15.5               | rs11024034 | 2746739  | C/T     | 0.99           | 0.126 | 0.091 | 1.45 | 9.64E-06 |

**Table S12: Case-control allele frequencies for best Meta-analysis results (All subjects)**

| Band                    | SNP        | A1/2 | Imputation R <sup>2</sup> |      |       | Case-control allele freqs and ORs for each dataset |       |      |                |       |      |                |       |       | Meta-analysis |                 |
|-------------------------|------------|------|---------------------------|------|-------|----------------------------------------------------|-------|------|----------------|-------|------|----------------|-------|-------|---------------|-----------------|
|                         |            |      | GAIN                      | GR   | S*D   | ----GAIN----                                       |       |      | ----GenRED---- |       |      | ----STAR*D---- |       |       | OR            | P               |
|                         |            |      |                           |      |       | Case                                               | Cont  | OR   | Case           | Cont  | OR   | Case           | Cont  | OR    | OR            | P               |
| <b>Broad phenotype</b>  |            |      |                           |      |       |                                                    |       |      |                |       |      |                |       |       |               |                 |
| 8p21.3                  | rs1106634  | A/G  | 0.70                      | 1    | 0.99  | 0.156                                              | 0.137 | 1.27 | 0.143          | 0.124 | 1.27 | 0.156          | 0.122 | 1.346 | 1.295         | <b>6.78E-07</b> |
| 7p15.3†                 | rs17144465 | A/G  | 1                         | 1    | 0.46  | 0.045                                              | 0.032 | 1.44 | 0.066          | 0.036 | 1.82 | 0.048          | 0.041 | 1.325 | 1.561         | <b>7.68E-07</b> |
| 3p26.1                  | rs9870680  | C/T  | 0.85                      | 1    | 1     | 0.484                                              | 0.443 | 1.23 | 0.478          | 0.433 | 1.22 | 0.457          | 0.433 | 1.104 | 1.188         | <b>1.11E-06</b> |
| 7q32.3                  | rs10265216 | A/T  | 1                         | 0.99 | 0.80  | 0.327                                              | 0.284 | 1.23 | 0.314          | 0.292 | 1.14 | 0.31           | 0.286 | 1.161 | 1.190         | <b>3.02E-06</b> |
| 3q26.32†                | rs644695   | A/G  | 0.74                      | 0.67 | 0.56  | 0.91                                               | 0.877 | 1.61 | 0.889          | 0.874 | 1.26 | 0.884          | 0.885 | 0.998 | 1.354         | <b>4.46E-06</b> |
| 2p14†                   | rs724568   | A/C  | 1                         | 1    | 0.99  | 0.4                                                | 0.358 | 1.2  | 0.368          | 0.355 | 1.09 | 0.395          | 0.357 | 1.191 | 1.171         | <b>5.32E-06</b> |
| 10p11.23                | rs1612122  | A/T  | 0.96                      | 0.95 | 0.92  | 0.514                                              | 0.482 | 1.15 | 0.522          | 0.481 | 1.2  | 0.558          | 0.524 | 1.266 | 1.230         | <b>6.11E-06</b> |
| Xq21.33                 | rs5990417  | T/C  | 0.94                      | 0.87 | 0.55  | 0.859                                              | 0.83  | 1.2  | 0.859          | 0.825 | 1.25 | 0.853          | 0.827 | 1.751 | 1.411         | <b>6.52E-06</b> |
| 6p25.1                  | rs2326810  | C/G  | 0.93                      | 0.86 | 0.75  | 0.949                                              | 0.939 | 1.21 | 0.942          | 0.921 | 1.48 | 0.942          | 0.916 | 1.177 | 1.169         | <b>6.98E-06</b> |
| <b>Narrow phenotype</b> |            |      |                           |      |       |                                                    |       |      |                |       |      |                |       |       |               |                 |
| 18q22.1                 | rs17077540 | A/G  | 0.33                      | 0.86 | 0.65  | 0.105                                              | 0.098 | 1.25 | 0.152          | 0.105 | 1.61 | 0.115          | 0.099 | 1.302 | 1.481         | <b>6.04E-07</b> |
| 5p13.2†                 | rs270592   | A/G  | 1                         | 0.99 | 0.99  | 0.608                                              | 0.573 | 1.17 | 0.639          | 0.572 | 1.32 | 0.6            | 0.571 | 1.15  | 1.223         | <b>1.88E-06</b> |
| Xp21.1                  | rs2405829  | A/G  | 0.96                      | 0.96 | 0.96  | 0.624                                              | 0.557 | 1.28 | 0.577          | 0.537 | 1.13 | 0.596          | 0.54  | 1.19  | 1.180         | <b>3.84E-06</b> |
| 6p22.1                  | rs6930508  | C/T  | 0.99                      | 1    | 1     | 0.604                                              | 0.553 | 1.24 | 0.605          | 0.564 | 1.18 | 0.612          | 0.564 | 1.231 | 1.213         | <b>4.73E-06</b> |
| 10p11.23                | rs1612122  | A/T  | 0.96                      | 0.95 | 0.92  | 0.535                                              | 0.482 | 1.28 | 0.522          | 0.481 | 1.2  | 0.556          | 0.524 | 1.176 | 1.218         | <b>5.39E-06</b> |
| 3p26.1                  | rs9870680  | C/T  | 0.85                      | 1    | 1     | 0.493                                              | 0.443 | 1.29 | 0.478          | 0.433 | 1.22 | 0.46           | 0.43  | 1.134 | 1.211         | <b>5.56E-06</b> |
| 3q25.1                  | rs1456139  | A/G  | 1                         | 0.84 | 0.84  | 0.646                                              | 0.608 | 1.18 | 0.656          | 0.615 | 1.24 | 0.659          | 0.613 | 1.242 | 1.219         | <b>7.92E-06</b> |
| 19p13.11                | rs7249956  | A/C  | 0.89                      | 0.90 | 0.73  | 0.813                                              | 0.778 | 1.27 | 0.813          | 0.773 | 1.26 | 0.792          | 0.761 | 1.316 | 1.277         | <b>8.11E-06</b> |
| 12q23.1                 | rs1895943  | A/C  | 0.99                      | 1    | 0.80  | 0.055                                              | 0.042 | 1.35 | 0.067          | 0.041 | 1.6  | 0.058          | 0.04  | 1.602 | 1.519         | <b>8.70E-06</b> |
| 6q22.1                  | rs1855625  | G/T  | 0.998                     | 1    | 0.996 | 0.723                                              | 0.699 | 1.11 | 0.733          | 0.684 | 1.28 | 0.73           | 0.68  | 1.279 | 1.226         | <b>9.34E-06</b> |
| 1p32.2                  | rs6694643  | A/T  | 0.99                      | 1    | 0.89  | 0.165                                              | 0.117 | 1.51 | 0.145          | 0.123 | 1.21 | 0.132          | 0.114 | 1.189 | 1.294         | <b>9.50E-06</b> |

Shown in each table are results from GenRED GWAS Table2 and meta-analysis Tables 5 and 6 for All Subjects with case and control allele frequencies ( some columns have been omitted for clarity). The allele frequencies and ORs are for the bolded allele. These details are provided to give the reader a sense of the kinds of frequency differences that are detected here. We have avoided providing exact frequencies for large numbers of SNPs because of issues of subject identifiability. <sup>1</sup> Full data are available

under controlled access procedures from the NIMH and dbGAP repositories. Note that for a small proportion of SNPs (here, rs1612122 is the only example), the control frequencies for GenRED and STAR\*D differ more than expected, despite the fact that the control groups are identical. This occurs for some imputed SNPs because the control genotypes have been imputed with the SNPs available for the case group for each analysis -- ~ 260K SNPs for STAR\*D vs. ~ 670K for GenRED. The reasons for the size of the discrepancy require further study, but this phenomenon was not observed for the best findings in the candidate genes that have been highlighted in the text.

#### e. Gene symbols, descriptions and functions

**Table S13: Gene names and functions for genes listed in GenRED GWAS Table 2**

| Symbol   | Description                                    | Function                                                                       |
|----------|------------------------------------------------|--------------------------------------------------------------------------------|
| AGBL4    | ATP/GTP binding protein-like 4                 | Processing of tubulin                                                          |
| AMPD2    | adenosine monophosphate deaminase 2            | Energy metabolism                                                              |
| ATXN7L2  | ataxin 7-like 2                                | Potential transcription factor                                                 |
| C2orf71  | hypothetical protein LOC388939                 | Hypothetical protein                                                           |
| CSMD1    | CUB and Sushi multiple domains 1               | Regulator of complement and inflammation in CNS                                |
| CYB561D1 | cytochrome b-561 domain containing 1           | Binds 2 heme groups non-covalently (By similarity)                             |
| DNM3     | dynammin 3                                     | Actin membrane budding                                                         |
| DSEL     | dermatan sulfate epimerase-like                | (DSE: D-glucuronic acid metabolism; tumor rejection)                           |
| DYNC2H1  | dynein, cytoplasmic, heavy polypeptide 2       | Intracellular transport                                                        |
| FAM179A  | hypothetical protein LOC165186                 | Hypothetical protein                                                           |
| FHIT     | fragile histidine triad gene                   | Purine metabolism; FRA3B fragile site                                          |
| FRAG1    | FGF receptor activating protein 1              | Mediates DNA damage-induced apoptosis                                          |
| GDNF     | glial cell derived neurotrophic factor         | Survival and differentiation of dopaminergic neurons                           |
| GNAI3    | guanine nucleotide binding protein (G protein) | Transmembrane signaling                                                        |
| GNAT2    | guanine nucleotide binding protein, alpha      | Visual system protein (transducin)                                             |
| KCNQ1    | potassium voltage-gated channel, KQT-like      | Voltage-gated potassium channel                                                |
| KIAA0859 | CGI-01 protein                                 | Methyltransferase                                                              |
| MYOC     | Myocilin                                       | Primarily found in uveal meshwork (visual)                                     |
| NUP98    | nucleoporin 98kD                               | Bidirectional transport across nucleoporin complex                             |
| PTPRG    | protein tyrosine phosphatase, receptor type G  | Stimulatory G protein (K <sup>+</sup> channels)                                |
| SP4      | Sp4 transcription factor                       | Transcriptional activator; binds to estrogen 1 receptor                        |
| STIM1    | stromal interaction molecule 1 precursor       | Mediation of Ca <sup>++</sup> influx following Ca <sup>++</sup> depletion (ER) |
| SYPL2    | mitsugumin 29                                  | Sarcoplasmic reticulum membrane communication                                  |
| VAMP4    | vesicle-associated membrane protein 4          | Maturation of secretory granules                                               |

Shown are gene symbol, description and function of genes mentioned in Table 2 (genes with SNPs with  $P < 10^{-5}$  within the gene, , or within 50 kb upstream or downstream).



**Table S14: Gene names and functions for genes listed in Meta-Analysis GWAS Tables 5 and 6**

| Symbol    | Description                                                 | Function                                                                                                                                     |
|-----------|-------------------------------------------------------------|----------------------------------------------------------------------------------------------------------------------------------------------|
| ARRB1     | arrestin beta 1                                             | Regulates beta-adrenergic receptor function; desensitize G-protein-coupled receptors                                                         |
| ATP6V1B2  | vacuolar H+ATPase B2                                        | See text                                                                                                                                     |
| C14orf109 | hypothetical protein LOC26175                               |                                                                                                                                              |
| C19orf50  | hypothetical protein LOC79036                               |                                                                                                                                              |
| C19orf60  | hypothetical protein LOC55049                               |                                                                                                                                              |
| C8A       | complement component 8, alpha polypeptide                   | Constituent of the membrane attack complex                                                                                                   |
| C8B       | complement component 8, beta polypeptide                    | Constituent of the membrane attack complex                                                                                                   |
| CLRN1     | clarin 1                                                    | Usher's syndrome IIIa; development of inner ear and retina                                                                                   |
| CRLF1     | cytokine receptor-like factor 1                             | May be involved in immune and nervous system development                                                                                     |
| DMD       | Dystrophin                                                  | Muscular dystrophies; cytoskeletal protein in muscle fibers                                                                                  |
| DSEL      | dermatan sulfate epimerase-like                             | DSE: D-glucuronic acid metabolism; tumor rejection)                                                                                          |
| EID3      | E1A-like inhibitor of differentiation 3                     | Repressor of nuclear receptor-dependent transcription; possibly interferes with CREBBP-dependent coactivation                                |
| FAM19A2   | family with sequence similarity 19 (chemokine)              | Thought to be brain-specific cytokine                                                                                                        |
| GALNT13   | UDP-N-acetyl-alpha-D-galactosamine:polypeptide              | Oligosaccharide biosynthesis; possible role in synthesis of Tn antigen in neurons                                                            |
| GDNF      | glial cell derived neurotrophic factor                      | Survival and differentiation of dopaminergic neurons                                                                                         |
| GRM7      | glutamate receptor, metabotropic 7                          | See text                                                                                                                                     |
| GUSBL1    | glucuronidase, beta-like 1                                  | Spinal muscular atrophy candidate gene 3-like 2                                                                                              |
| HS3ST5    | heparan sulfate (glucosamine), heparan sulfate              | Biosynthesis of anticoagulant heparan sulfate; generates binding site for Herpes simplex virus-1                                             |
| IGSF9B    | immunoglobulin superfamily, member 9B                       |                                                                                                                                              |
| INTU      | inturned planar cell polarity effector homolog (Drosophila) | Formerly: PDZ domain containing 6                                                                                                            |
| ITPK1     | inositol 1,3,4-triphosphate 5/6 kinase                      | Phosphorylates inositol polyphosphates; modulates TNF-alpha-induced apoptosis                                                                |
| KLHL25    | BTB/POZ KELCH domain protein                                | Kelch-like 25 (Drosophila)                                                                                                                   |
| KLHL26    | kelch-like 26                                               | Kelch-like 26 (Drosophila)                                                                                                                   |
| KSP37     | kidney specific protein of 37 kda                           |                                                                                                                                              |
| LY86      | MD-1, RP105-associated                                      | Mediates immune response to bacterial lipopolysaccharide and cytokine production                                                             |
| LZTS1     | leucine zipper, putative tumor suppressor 1                 | Regulation of cell growth                                                                                                                    |
| MOAP1     | modulator of apoptosis 1                                    | Required for death receptor-dependent apoptosis.                                                                                             |
| PLEKHA7   | pleckstrin homology domain containing, family A             | See text                                                                                                                                     |
| PLXDC2    | plexin domain containing 2 precursor                        | May play a role in tumor angiogenesis                                                                                                        |
| PRDM4     | PR domain containing 4                                      | May function as a transcription factor involved in cell differentiation                                                                      |
| SLC18A1   | solute carrier family 18 (vesicular monoamine)              | Acts to accumulate cytosolic monoamines into vesicles                                                                                        |
| SP4       | Sp4 transcription factor                                    | Transcriptional activator; binds to estrogen 1 receptor*                                                                                     |
| TMEM59L   | transmembrane protein 59-like                               | Brain-specific predicted type-I membrane glycoprotein                                                                                        |
| TXNRD1    | thioredoxin reductase 1                                     | Induces actin and tubulin polymerization, mediates interferon-beta-induced cell death                                                        |
| UBA52     | ubiquitin and ribosomal protein L40 precursor               | proteasomal degradation; maintenance of chromatin structure; regulation of gene expression; stress response, ribosome biogenesis; DNA repair |

**Table S15: Gene names and descriptions for genes listed in STAR\*D GWAS Table 4**

| <b>Symbol</b> | <b>Description</b>                             |
|---------------|------------------------------------------------|
| AK125573      | (mRNA)                                         |
| ANKRD46       | ankyrin repeat domain 46                       |
| C21orf94      | chromosome 21 open reading frame 94            |
| C8orf71       | chromosome 8 open reading frame 71             |
| CDH20         | cadherin 20, type 2 preproprotein              |
| COX8A         | cytochrome c oxidase subunit 8A                |
| CSMD3         | CUB and Sushi multiple domains 3 isoform 1     |
| CTNND2        | catenin (cadherin-associated protein), delta 2 |
| GVIN1         | GTPase, very large interferon inducible 1      |
| HLX           | H2.0-like homeo box 1                          |
| HPCAL1        | hippocalcin-like 1                             |
| NLGN4X        | X-linked neuroligin 4                          |
| PABPC1        | poly(A) binding protein, cytoplasmic 1         |
| RAB30         | RAB30, member RAS oncogene family              |
| RPRM          | reprimin, TP53 dependant G2 arrest mediator    |
| RUFY4         | RUN and FYVE domain containing 4               |
| SCIN          | Scinderin                                      |
| SLC5A12       | solute carrier family 5 (sodium/glucose        |
| SRD5A2        | 3-oxo-5 alpha-steroid 4-dehydrogenase 2        |
| SVIP          | small VCP/p97-interacting protein              |
| TMX3          | thioredoxin-related transmembrane protein 3    |

## 5. SUPPLEMENTARY ACKNOWLEDGEMENTS.

Full Acknowledgements for the **GenRED GWAS** include:

The GenRED project is supported by NIMH R01 grants MH061686 (to D.F.L.), MH059542 (to W.C.), MH075131 (to W.B.L.), MH059552 (to J.B.P.), MH059541 (to W.A.S.) and MH060912 (to M.M.W.). We acknowledge the contributions of Dr. George S. Zubenko and Dr. Wendy N. Zubenko, Department of Psychiatry, University of Pittsburgh School of Medicine, to the GenRED I project. The NIMH Cell Repository at Rutgers University and the NIMH Center for Collaborative Genetic Studies on Mental Disorders made essential contributions to this project.

Genotyping was carried out by the Broad Institute Center for Genotyping and Analysis (Stacey Gabriel and D.B.M.); the center is supported by grant U54 RR020278 (which partially subsidized the genotyping of the GenRED cases) from the National Center for Research Resources.

GWAS data for the GAIN-MDD dataset were accessed by D.F.L. through the Genetic Association Information Network (GAIN), through dbGaP accession number phs000020.v1.p1 ([http://www.ncbi.nlm.nih.gov/projects/gap/cgi-bin/study.cgi?study\\_id=phs000020.v2.p1](http://www.ncbi.nlm.nih.gov/projects/gap/cgi-bin/study.cgi?study_id=phs000020.v2.p1)); samples and associated phenotype data for Major Depression: Stage 1 Genomewide Association in Population-Based Samples were provided by P. Sullivan.

GWAS data for MGS control subjects was used in these analyses by permission of the MGS project (P.V.G., coordinator). MGS control data can be accessed through dbGAP ([http://www.ncbi.nlm.nih.gov/projects/gap/cgi-bin/study.cgi?study\\_id=phs000021.v2.p1&phv=20121&phd=803&pha=&pht=289&phsf=&phvf=&phdf=0&phaf=&phtf=&dssp=1&temp=1](http://www.ncbi.nlm.nih.gov/projects/gap/cgi-bin/study.cgi?study_id=phs000021.v2.p1&phv=20121&phd=803&pha=&pht=289&phsf=&phvf=&phdf=0&phaf=&phtf=&dssp=1&temp=1)). Collection of the Molecular Genetics of Schizophrenia (MGS) control subjects was completed as part of the MGS project, supported by NIMH R01 grants MH67257 (to Nancy G. Buccola, Louisiana State University Health Sciences Center, New Orleans), MH59588 to Bryan J. Mowry (Queensland Center for Schizophrenia Research and University of Queensland), MH59571 (to P.V.G.), MH59565 (to Robert Freedman, University of Colorado), MH59587 (to Farooq Amin, Emory University), MH60870 (to William F. Byerley, University of California at San Francisco), MH59566 (to Donald W. Black, University of Iowa), MH59586 (to Jeremy M. Silverman, Mt. Sinai Medical School), MH61675 (to D.F.L.), and MH60879 (to C.Robert Cloninger, Washington University at St. Louis). Genotyping and quality control analyses of MGS control subjects was supported by NIMH grants U01-MH79469 (to P.V.G.), and U01-MH79470 (to D.F.L.); National Alliance for Research on Schizophrenia and Depression Young Investigator Awards (to J.D. and A.R.S.); and the Genetic Association Information Network (GAIN) ([http://www.fnih.org/index.php?option=com\\_content&task=view&id=338&Itemid=454](http://www.fnih.org/index.php?option=com_content&task=view&id=338&Itemid=454)).

The authors express their profound appreciation to the families who participated in this project, and to the many clinicians who facilitated the referral of participants to the study.

## 6. SUPPLEMENTARY REFERENCES

1. Homer N, Szlinger S, Redman M, Duggan D, Tembe W, Muehling J *et al.* Resolving individuals contributing trace amounts of DNA to highly complex mixtures using high-density SNP genotyping microarrays. *PLoS Genet* 2008 Aug; **4**(8): e1000167.
2. Sanders AR, Duan J, Levinson DF, Shi J, He D, Hou C *et al.* No significant association of 14 candidate genes with schizophrenia in a large European ancestry sample: implications for psychiatric genetics. *Am J Psychiatry* 2008 Apr; **165**(4): 497-506.
3. Shi J, Levinson DF, Duan J, Sanders AR, Zheng Y, Pe'er I *et al.* Common variants on chromosome 6p22.1 are associated with schizophrenia. *Nature* 2009 Jul 1.
4. Korn JM, Kuruvilla FG, McCarroll SA, Wysoker A, Nemesh J, Cawley S *et al.* Integrated genotype calling and association analysis of SNPs, common copy number polymorphisms and rare CNVs. *Nat Genet* 2008 Oct; **40**(10): 1253-1260.
5. Price AL, Patterson NJ, Plenge RM, Weinblatt ME, Shadick NA, Reich D. Principal components analysis corrects for stratification in genome-wide association studies. *Nat Genet* 2006 Aug; **38**(8): 904-909.
6. Clayton DG, Walker NM, Smyth DJ, Pask R, Cooper JD, Maier LM *et al.* Population structure, differential bias and genomic control in a large-scale, case-control association study. *Nat Genet* 2005 Nov; **37**(11): 1243-1246.
7. Huang L, Li Y, Singleton AB, Hardy JA, Abecasis G, Rosenberg NA *et al.* Genotype-imputation accuracy across worldwide human populations. *Am J Hum Genet* 2009 Feb; **84**(2): 235-250.
8. Sklar P, Smoller JW, Fan J, Ferreira MA, Perlis RH, Chambert K *et al.* Whole-genome association study of bipolar disorder. *Mol Psychiatry* 2008 Jun; **13**(6): 558-569.
9. Bhangale TR, Rieder MJ, Nickerson DA. Estimating coverage and power for genetic association studies using near-complete variation data. *Nat Genet* 2008 Jul; **40**(7): 841-843.
10. Sullivan PF, de Geus EJC, Willemsen G, James MR, Smit JH, Zandbelt T *et al.* Genome-wide association for major depressive disorder: a possible role for the presynaptic protein piccolo. *Mol Psychiatry* 2008 12/09/online.
11. Marchini J, Howie B, Myers S, McVean G, Donnelly P. A new multipoint method for genome-wide association studies by imputation of genotypes. *Nat Genet* 2007 Jul; **39**(7): 906-913.
12. Muglia P, Tozzi F, Galwey NW, Francks C, Upmanyu R, Kong XQ *et al.* Genome-wide association study of recurrent major depressive disorder in two European case-control cohorts. *Mol Psychiatry* 2008 12/23/online.
13. Levinson DF. The genetics of depression: a review. *Biol Psychiatry* 2006 Jul 15; **60**(2): 84-92.

14. Verma R, Holmans P, Knowles JA, Grover D, Evgrafov OV, Crowe RR *et al.* Linkage disequilibrium mapping of a chromosome 15q25-26 major depression linkage region and sequencing of NTRK3. *Biol Psychiatry* 2008 Jun 15; **63**(12): 1185-1189.
